# Supplementary material for: Carbon–sulfur bond elongation as the promoting reaction coordinate in the efficient sub-nanosecond intersystem crossing in thianaphthene derivatives
Source: Royal Society of Chemistry journal article supplement (doi:10.1039/d4cp02849j), 2024-01-01
Supplement: d4cp02849j1.pdf [file d4cp02849j1.pdf]

**Carbon-sulfur bond elongation is the promoting reaction coordinate in the efficient sub-nanosecond intersystem crossing in thianaphthene derivatives**

Cameron Griffith, Erqian Mao, Sean J. Hoehn, Sarah Krul and Carlos E. Crespo-Hernández\*

Department of Chemistry, Case Western Reserve University, Cleveland, Ohio 44106,

United States; \* E-mail: cxc302@case.edu

**Supplementary Information**

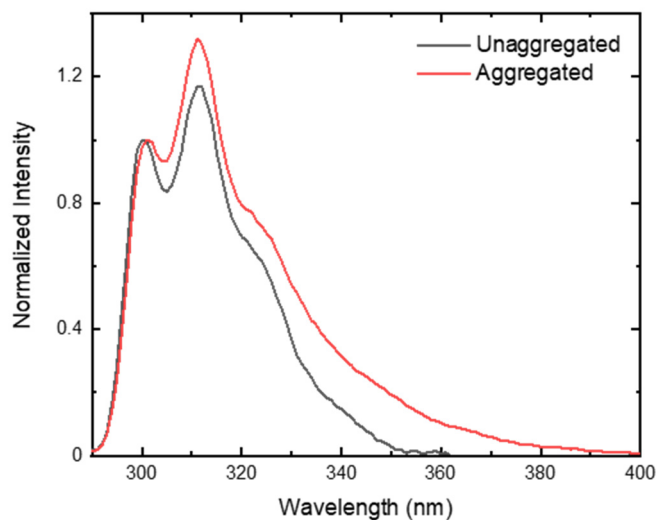

**Figure S1.** Normalized fluorescence spectra of thianaphene in acetonitrile at concentrations where monomer emission is only observed ( $< 7 \times 10^{-5}$  M) and where aggregates or excimer emission is observed ( $> 7 \times 10^{-5}$  M).

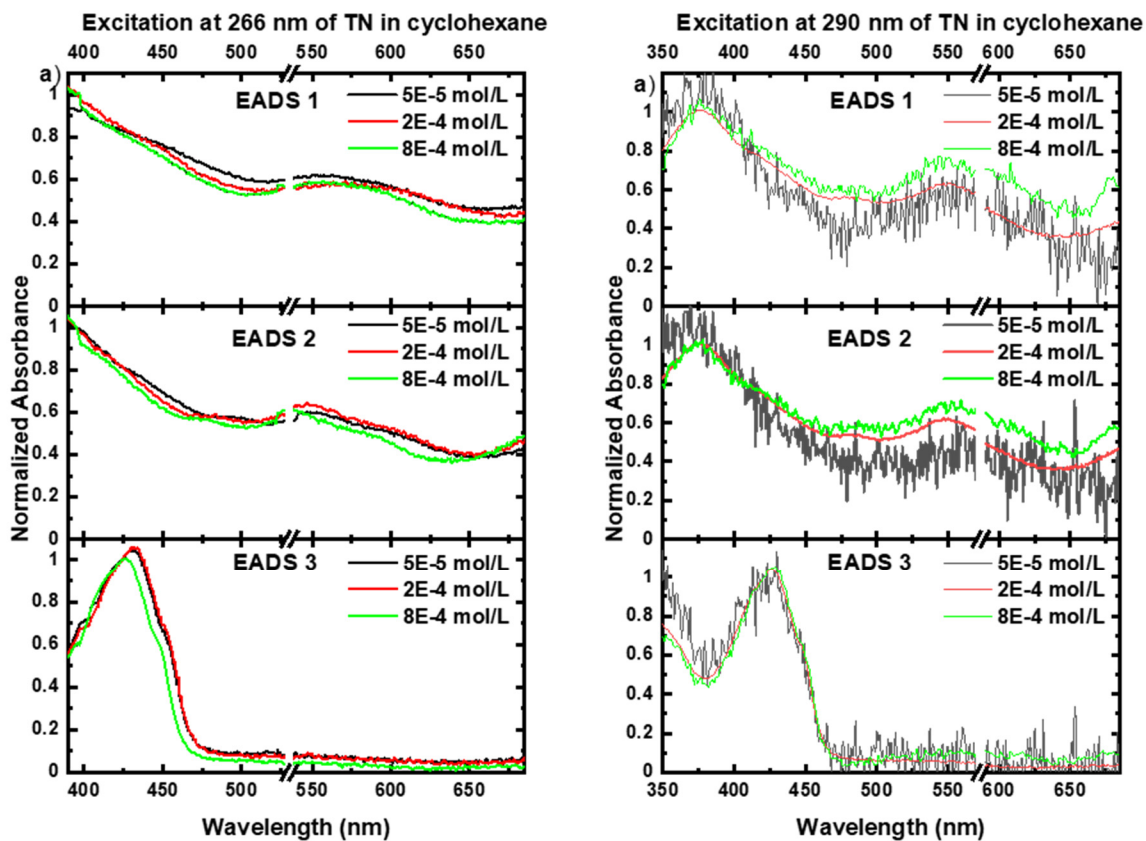

**Figure S2.** Evolution associated difference spectra of thianaphthene in cyclohexane at excitation of a) 266 nm and b) 290 nm were obtained from global and target analysis. The break is included to remove the overtone signal that comes from the excitation source.

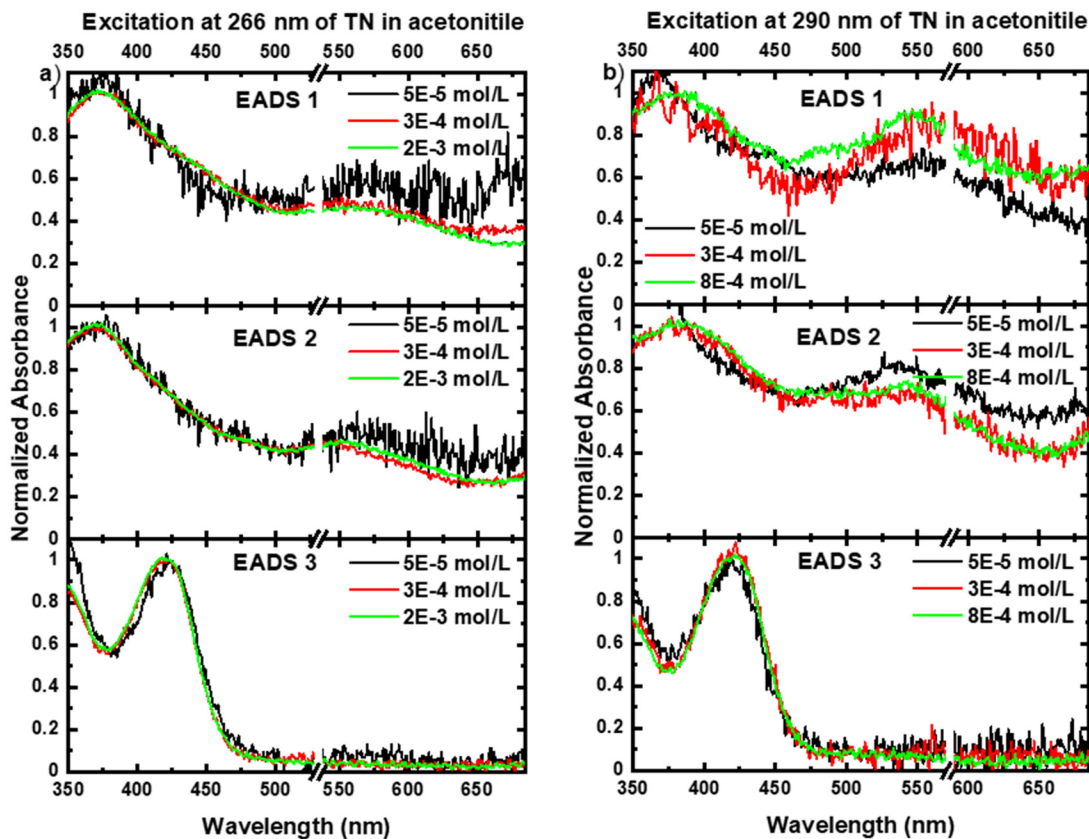

**Figure S3.** Evolution associated difference spectra of thianaphthene in acetonitrile at excitation of a) 266 nm and b) 290 nm were obtained from global and target analysis. The break is included to remove the overtone signal that comes from the excitation source.

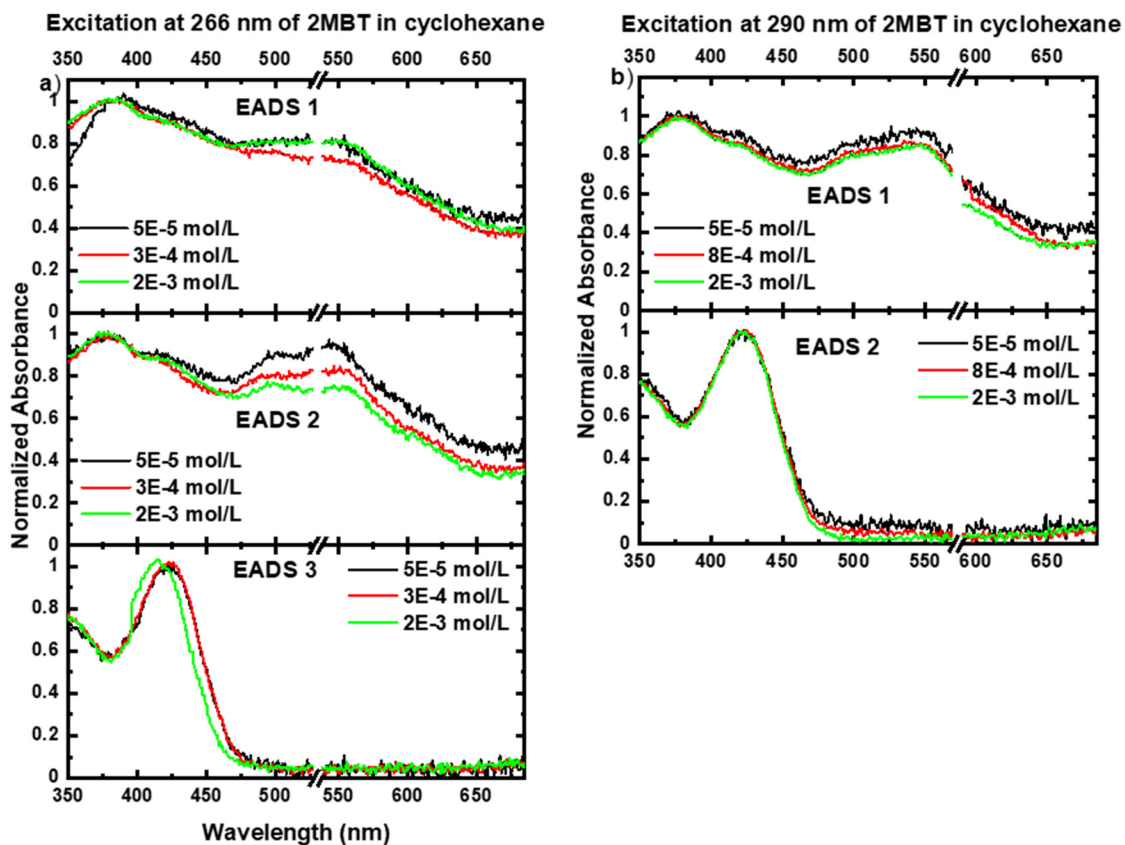

**Figure S4.** Evolution associated difference spectra of 2-methylbenzothiophene in cyclohexane at excitation of a) 266 nm and b) 290 nm were obtained from global and target analysis. The break is included to remove the overtone signal that comes from the excitation source.



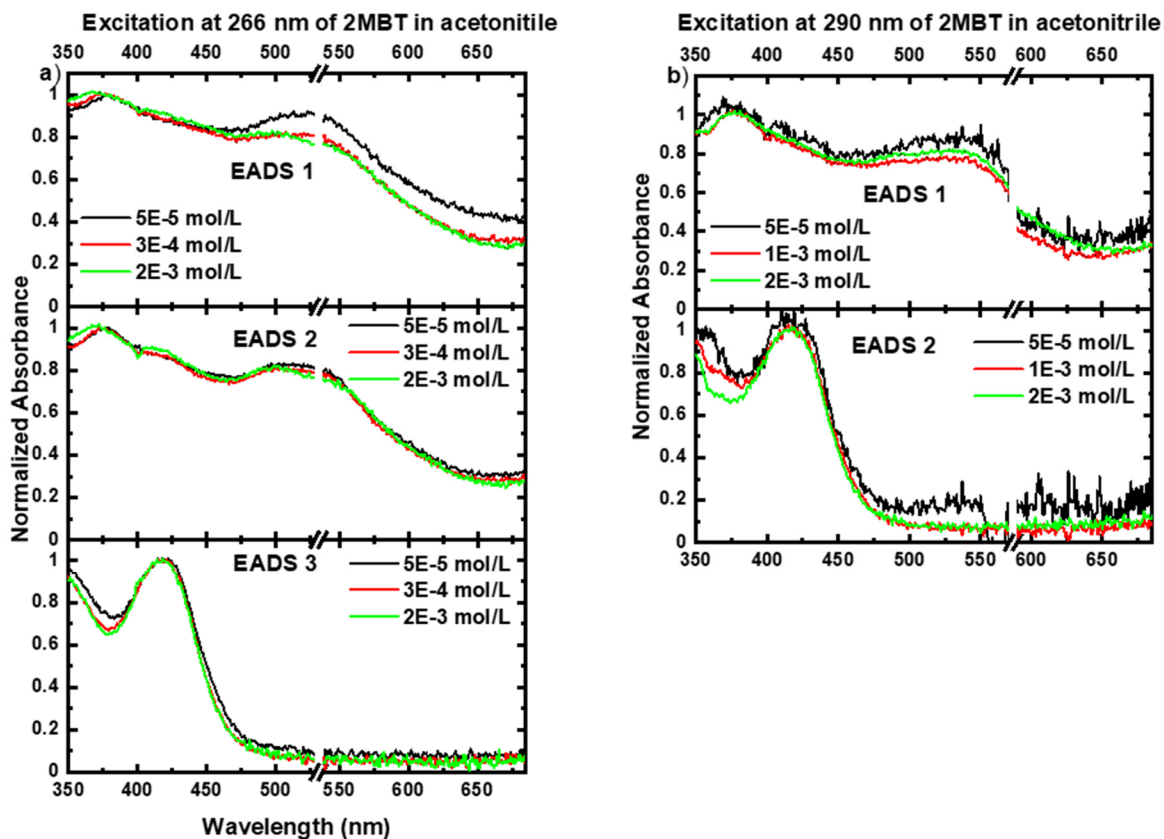

**Figure S5.** Evolution associated difference spectra of 2-methylbenzothiophene in acetonitrile at excitation of a) 266 nm and b) 290 nm were obtained from global and target analysis. The break is included to remove the overtone signal that comes from the excitation source.

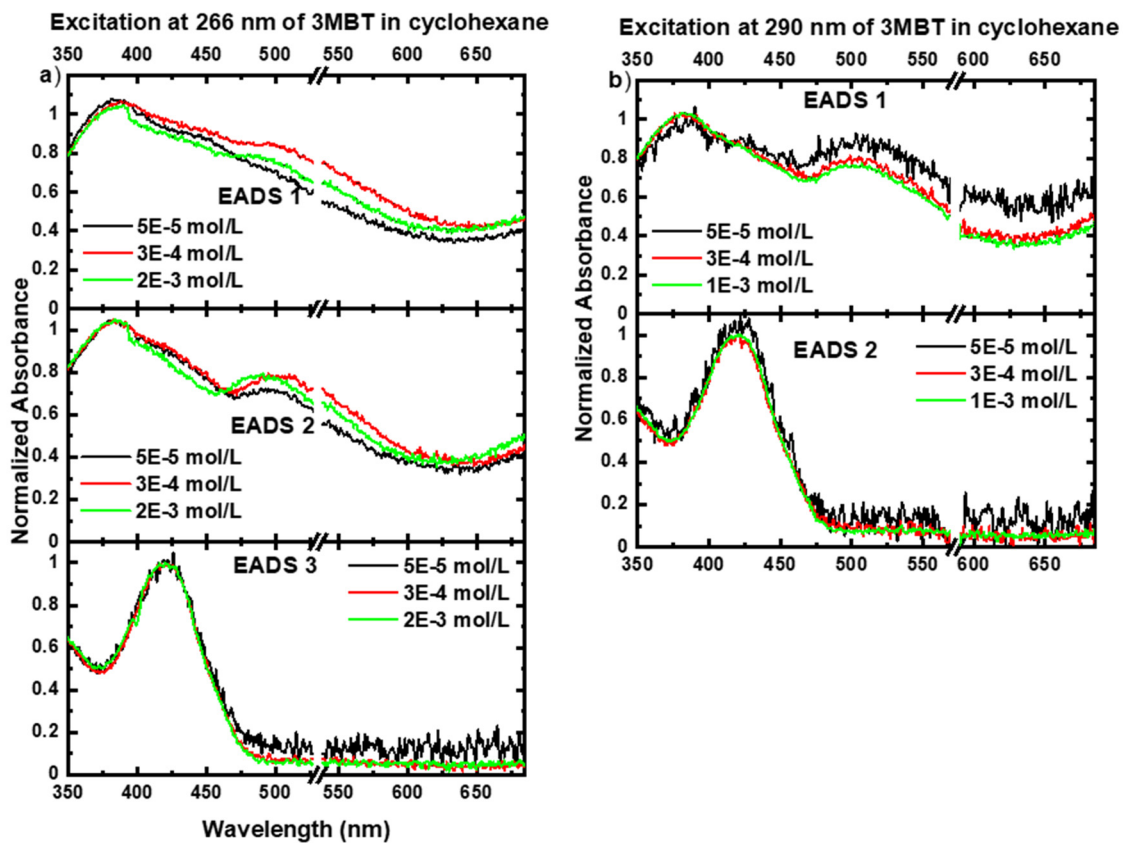

**Figure S6.** Evolution associated difference spectra of 3-methylbenzothiophene in cyclohexane at excitation of a) 266 nm and b) 290 nm were obtained from global and target analysis. The break is included to remove the overtone signal that comes from the excitation source.

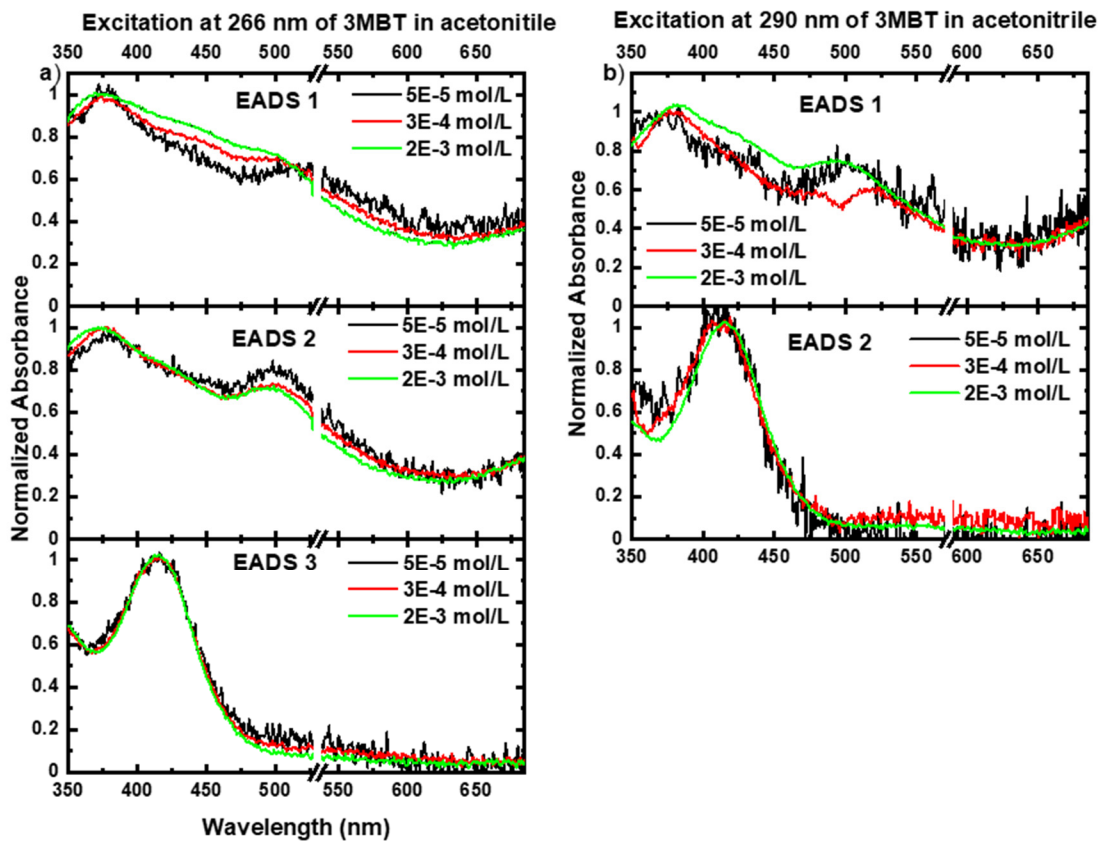

**Figure S7.** Evolution associated difference spectra of 3-methylbenzothiophene in acetonitrile at excitation of a) 266 nm and b) 290 nm were obtained from global and target analysis. The break is included to remove the overtone signal that comes from the excitation source.

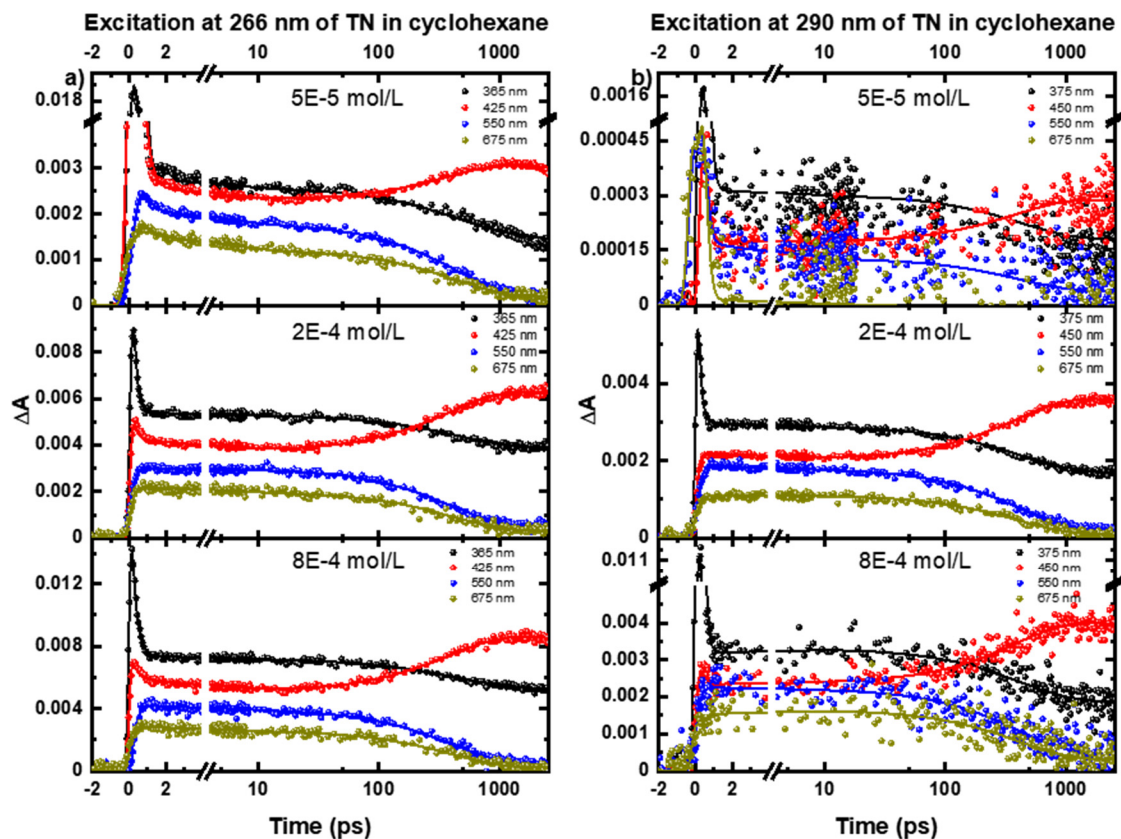

**Figure S8.** Representative kinetic traces of varying concentrations of thianaphrene in cyclohexane at excitation of a) 266 nm and b) 290 nm performed with Glotaran using a 4-component model.

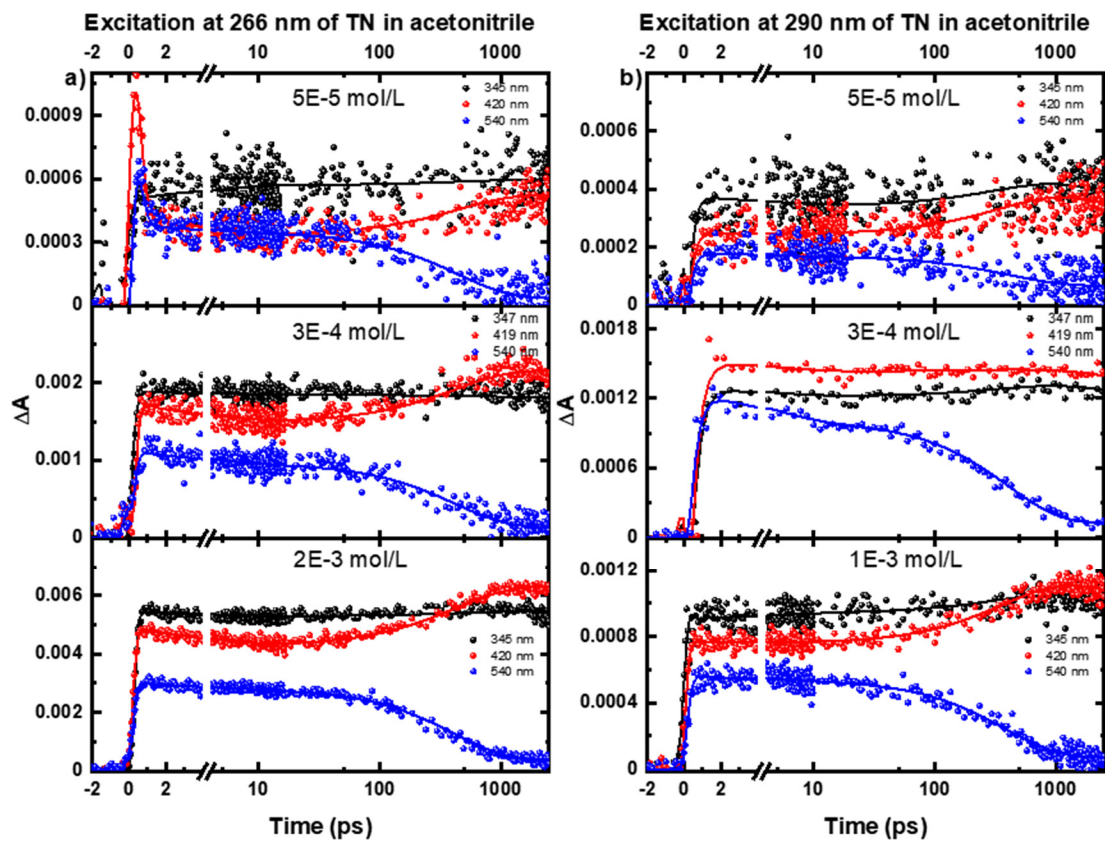

**Figure S9.** Representative kinetic traces of varying concentrations of thianaphthene in acetonitrile at excitation of a) 266 nm and b) 290 nm performed with Glotaran using a 3-component model.

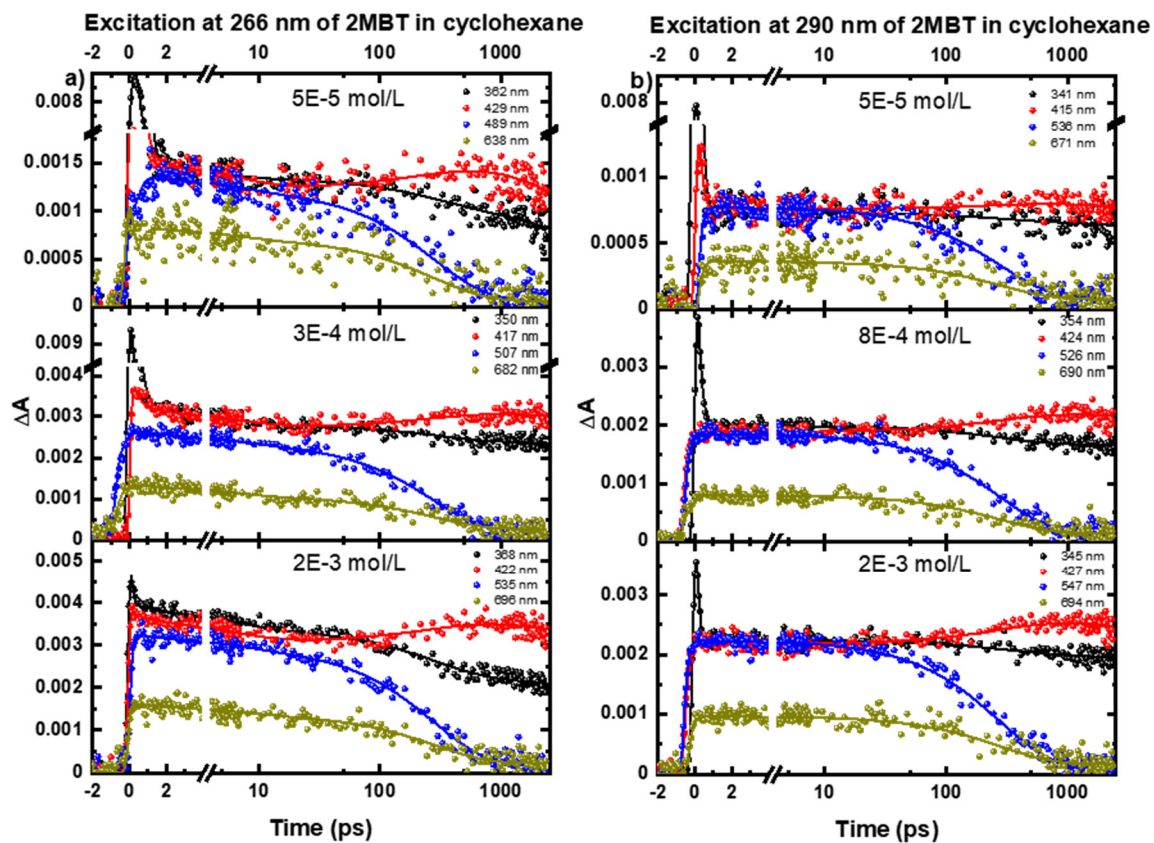

**Figure S10.** Representative kinetic traces of varying concentrations of 2-methylbenzothiophene in cyclohexane at excitation of a) 266 nm and b) 290 nm performed with Glotaran using a 4-component model for 266 nm and a 3-component model for 290 nm.



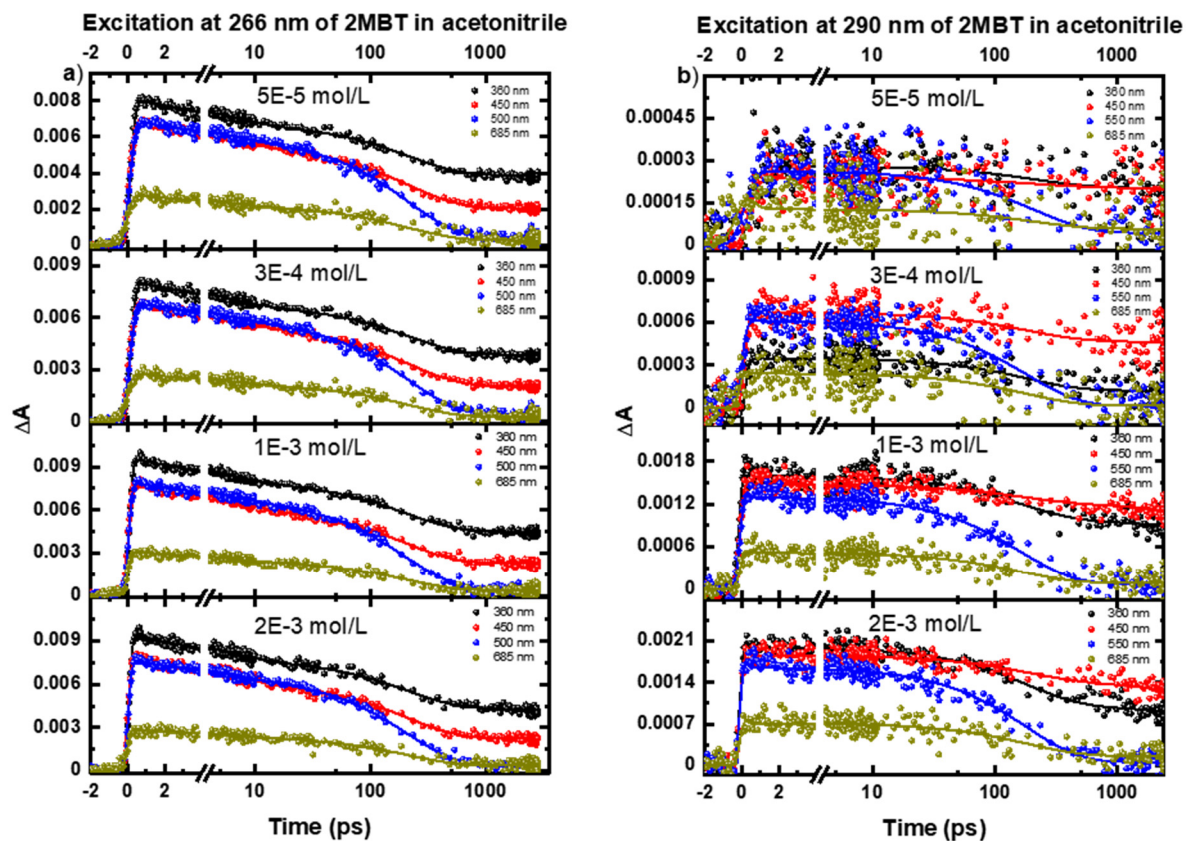

**Figure S11.** Representative kinetic traces of varying concentrations of 2-methylbenzothiophene in acetonitrile at excitation of a) 266 nm and b) 290 nm performed with Glotaran using a 3-component model for 266 nm and a 2-component model for 290 nm.

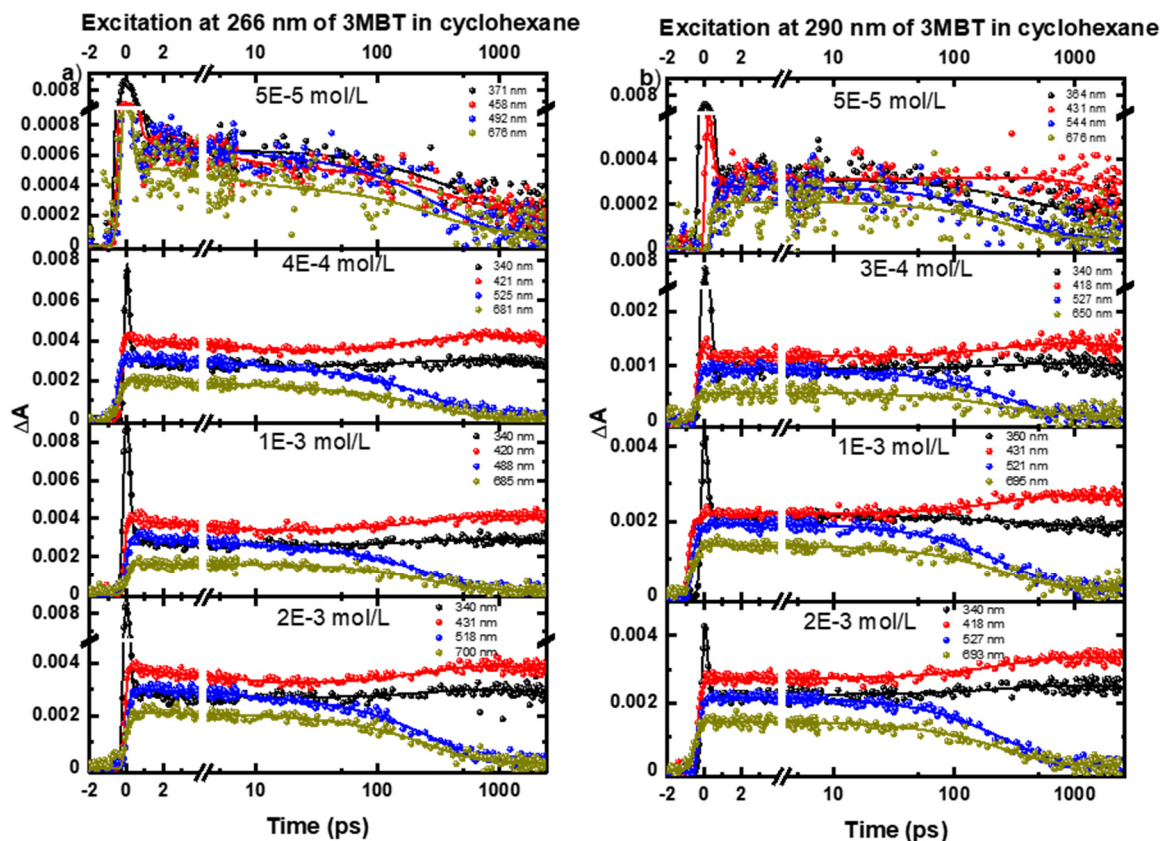

**Figure S12.** Representative kinetic traces of varying concentrations of 3-methylbenzothiophene in cyclohexane at excitation of a) 266 nm and b) 290 nm performed with Glotaran using a 4-component model for 266 nm and a 3-component model for 290 nm.



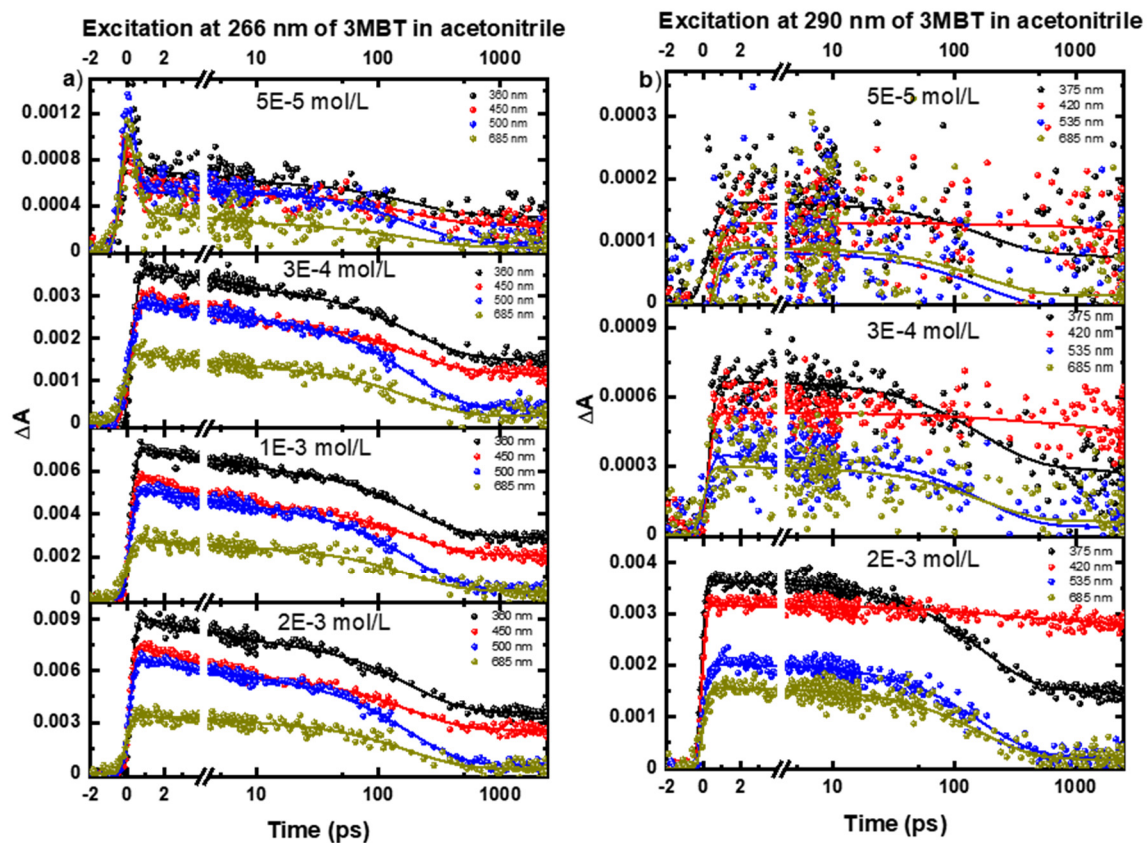

**Figure S13.** Representative kinetic traces of varying concentrations of 3-methylbenzothiophene in acetonitrile at excitation of a) 266 nm and b) 290 nm performed with Glotaran using a 3-component model for 266 nm and a 2-component model for 290 nm.

**Table S1.** Vertical excitation energies, electronic structure, and oscillator strengths of TN in acetonitrile at ground state minimum geometry obtained at TDA-PBE0/CPCM/def2-TZVPD level of theory. Components of electronic structure with a contribution less than 0.10 are omitted.

| State              | Electronic Structure |   |     |       | VEE/eV | f(r) |     |       |     |   |     |       |      |        |
|--------------------|----------------------|---|-----|-------|--------|------|-----|-------|-----|---|-----|-------|------|--------|
| $S_1(\pi\pi^*)$    | H                    | → | L   | 0.49; | H-1    | →    | L   | 0.21; | H   | → | L+1 | 0.16; | 4.76 | 0.0835 |
| $S_2(\pi\pi^*)$    | H                    | → | L+1 | 0.47; | H      | →    | L   | 0.33; | H-1 | → | L+1 | 0.14; | 4.98 | 0.0417 |
| $S_3(\pi\sigma^*)$ | H-1                  | → | L+2 | 0.92; |        |      |     |       |     |   |     |       | 5.35 | 0.0000 |
| $S_4(\pi\pi^*)$    | H-1                  | → | L   | 0.50; | H      | →    | L+1 | 0.27; |     |   |     |       | 5.68 | 0.4748 |
| $T_1(\pi\pi^*)$    | H                    | → | L   | 0.83; |        |      |     |       |     |   |     |       | 3.42 |        |
| $T_2(\pi\pi^*)$    | H                    | → | L+1 | 0.71; |        |      |     |       |     |   |     |       | 4.12 |        |
| $T_3(\pi\pi^*)$    | H-1                  | → | L   | 0.77; | H      | →    | L   | 0.11; |     |   |     |       | 4.20 |        |
| $T_4(\pi\pi^*)$    | H-1                  | → | L+1 | 0.75; | H      | →    | L+1 | 0.13; |     |   |     |       | 4.56 |        |
| $T_5(\pi\pi^*)$    | H                    | → | L+5 | 0.47; | H-2    | →    | L   | 0.29; |     |   |     |       | 4.96 |        |
| $T_6(\pi\sigma^*)$ | H-1                  | → | L+2 | 0.81; |        |      |     |       |     |   |     |       | 5.08 |        |

**Table S2.** Vertical excitation energies, electronic structure, and oscillator strengths of TN in cyclohexane at ground state minimum geometry obtained at TDA-PBE0/CPCM/def2-TZVPD level of theory. Components of electronic structure with a contribution less than 0.10 are omitted.

| State              | Electronic Structure                                                          | VEE/eV | f(r)   |
|--------------------|-------------------------------------------------------------------------------|--------|--------|
| $S_1(\pi\pi^*)$    | H $\rightarrow$ L 0.53; H-1 $\rightarrow$ L 0.20; H $\rightarrow$ L+1 0.14;   | 4.74   | 0.0912 |
| $S_2(\pi\pi^*)$    | H $\rightarrow$ L+1 0.48; H $\rightarrow$ L 0.30; H-1 $\rightarrow$ L+1 0.16; | 4.97   | 0.0415 |
| $S_3(\pi\sigma^*)$ | H-1 $\rightarrow$ L+2 0.92;                                                   | 5.29   | 0.0000 |
| $S_4(\pi\pi^*)$    | H-1 $\rightarrow$ L 0.50; H $\rightarrow$ L+1 0.29;                           | 5.65   | 0.5325 |
| $T_1(\pi\pi^*)$    | H $\rightarrow$ L 0.82;                                                       | 3.41   |        |
| $T_2(\pi\pi^*)$    | H $\rightarrow$ L+1 0.70;                                                     | 4.11   |        |
| $T_3(\pi\pi^*)$    | H-1 $\rightarrow$ L 0.76; H $\rightarrow$ L 0.10;                             | 4.18   |        |
| $T_4(\pi\pi^*)$    | H-1 $\rightarrow$ L+1 0.75; H $\rightarrow$ L+1 0.13;                         | 4.56   |        |
| $T_5(\pi\pi^*)$    | H $\rightarrow$ L+5 0.47; H-2 $\rightarrow$ L 0.29;                           | 4.95   |        |
| $T_6(\pi\sigma^*)$ | H-1 $\rightarrow$ L+2 0.82;                                                   | 5.03   |        |

**Table S3.** Vertical excitation energies, electronic structure, and oscillator strengths of 2MBT in vacuum at ground state minimum geometry obtained at TDA-PBE0/def2-TZVPD level of theory.

Components of electronic structure with a contribution less than 0.10 are omitted.

| State              | Electronic Structure                                                          | VEE/eV | f(r)   |
|--------------------|-------------------------------------------------------------------------------|--------|--------|
| $S_1(\pi\pi^*)$    | H-1 $\rightarrow$ L 0.31; H $\rightarrow$ L 0.31; H $\rightarrow$ L+1 0.25;   | 4.74   | 0.0378 |
| $S_2(\pi\pi^*)$    | H $\rightarrow$ L 0.45; H $\rightarrow$ L+1 0.36;                             | 4.98   | 0.0637 |
| $S_3(\pi\sigma^*)$ | H $\rightarrow$ L+2 0.88;                                                     | 5.15   | 0.0004 |
| $S_4(\pi\sigma^*)$ | H-1 $\rightarrow$ L+2 0.76;                                                   | 5.60   | 0.0332 |
| $T_1(\pi\pi^*)$    | H $\rightarrow$ L 0.82;                                                       | 3.41   |        |
| $T_2(\pi\pi^*)$    | H $\rightarrow$ L+1 0.58; H-1 $\rightarrow$ L 0.19;                           | 4.10   |        |
| $T_3(\pi\pi^*)$    | H-1 $\rightarrow$ L 0.63; H-1 $\rightarrow$ L+1 0.16; H $\rightarrow$ L 0.12; | 4.16   |        |
| $T_4(\pi\pi^*)$    | H-1 $\rightarrow$ L+1 0.63; H $\rightarrow$ L+1 0.24;                         | 4.44   |        |
| $T_5(\pi\sigma^*)$ | H $\rightarrow$ L+2 0.75;                                                     | 4.89   |        |
| $T_6(\pi\pi^*)$    | H-1 $\rightarrow$ L+5 0.49; H-2 $\rightarrow$ L 0.26;                         | 4.93   |        |

**Table S4.** Vertical excitation energies, electronic structure, and oscillator strengths of 2MBT in acetonitrile at ground state minimum geometry obtained at TDA-PBE0/CPCM/def2-TZVPD level of theory. Components of electronic structure with a contribution less than 0.10 are omitted.

| State              | Electronic Structure |   |     |       |     |   |     |       | VEE/eV | f(r) |     |       |      |        |
|--------------------|----------------------|---|-----|-------|-----|---|-----|-------|--------|------|-----|-------|------|--------|
| $S_1(\pi\pi^*)$    | H-1                  | → | L   | 0.30; | H   | → | L   | 0.30; | H      | →    | L+1 | 0.30; | 4.73 | 0.0662 |
| $S_2(\pi\pi^*)$    | H                    | → | L   | 0.49; | H   | → | L+1 | 0.34; |        |      |     |       | 4.95 | 0.1079 |
| $S_3(\pi\sigma^*)$ | H                    | → | L+2 | 0.90; |     |   |     |       |        |      |     |       | 5.26 | 0.0003 |
| $S_4(\pi\pi^*)$    | H-1                  | → | L   | 0.52; | H   | → | L+1 | 0.28; |        |      |     |       | 5.53 | 0.4220 |
| $T_1(\pi\pi^*)$    | H                    | → | L   | 0.83; |     |   |     |       |        |      |     |       | 3.42 |        |
| $T_2(\pi\pi^*)$    | H                    | → | L+1 | 0.63; | H-1 | → | L+1 | 0.12; | H-1    | →    | L   | 0.11  | 4.11 |        |
| $T_3(\pi\pi^*)$    | H-1                  | → | L   | 0.69; | H-1 | → | L+1 | 0.16; |        |      |     |       | 4.20 |        |
| $T_4(\pi\pi^*)$    | H-1                  | → | L+1 | 0.60; | H   | → | L+1 | 0.25; | H-1    | →    | L   | 0.12  | 4.44 |        |
| $T_5(\pi\pi^*)$    | H                    | → | L+4 | 0.47; | H-2 | → | L   | 0.26; |        |      |     |       | 4.95 |        |
| $T_6(\pi\sigma^*)$ | H-1                  | → | L+2 | 0.77; |     |   |     |       |        |      |     |       | 5.00 |        |

**Table S5.** Vertical excitation energies, electronic structure, and oscillator strengths of 2MBT in cyclohexane at ground state minimum geometry obtained at TDA-PBE0/CPCM/def2-TZVPD level of theory. Components of electronic structure with a contribution less than 0.10 are omitted.

| State              | Electronic Structure                                                            | VEE/eV | f(r)   |
|--------------------|---------------------------------------------------------------------------------|--------|--------|
| $S_1(\pi\pi^*)$    | H $\rightarrow$ L 0.35; H-1 $\rightarrow$ L 0.29; H $\rightarrow$ L+1 0.26;     | 4.72   | 0.0763 |
| $S_2(\pi\pi^*)$    | H $\rightarrow$ L 0.46; H $\rightarrow$ L+1 0.36;                               | 4.95   | 0.1086 |
| $S_3(\pi\sigma^*)$ | H $\rightarrow$ L+2 0.89;                                                       | 5.20   | 0.0004 |
| $S_4(\pi\pi^*)$    | H-1 $\rightarrow$ L 0.51; H $\rightarrow$ L+1 0.30;                             | 5.52   | 0.4700 |
| $T_1(\pi\pi^*)$    | H $\rightarrow$ L 0.83;                                                         | 3.42   |        |
| $T_2(\pi\pi^*)$    | H $\rightarrow$ L+1 0.60; H-1 $\rightarrow$ L 0.15; H-1 $\rightarrow$ L+1 0.11; | 4.10   |        |
| $T_3(\pi\pi^*)$    | H-1 $\rightarrow$ L 0.67; H-1 $\rightarrow$ L+1 0.16; H $\rightarrow$ L 0.11;   | 4.18   |        |
| $T_4(\pi\pi^*)$    | H-1 $\rightarrow$ L+1 0.62; H $\rightarrow$ L+1 0.25; H-1 $\rightarrow$ L 0.10  | 4.44   |        |
| $T_5(\pi\pi^*)$    | H $\rightarrow$ L+5 0.48; H-2 $\rightarrow$ L 0.25;                             | 4.94   |        |
| $T_6(\pi\sigma^*)$ | H $\rightarrow$ L+2 0.76;                                                       | 4.95   |        |

**Table S6.** Vertical excitation energies, electronic structure, and oscillator strengths of 3MBT in the vacuum at ground state minimum geometry obtained at TDA-PBE0/def2-TZVPD level of theory. Components of electronic structure with a contribution less than 0.10 are omitted.

| State              | Electronic Structure                                                          | VEE/eV | f(r)   |
|--------------------|-------------------------------------------------------------------------------|--------|--------|
| $S_1(\pi\pi^*)$    | H $\rightarrow$ L 0.64; H-1 $\rightarrow$ L 0.15; H-1 $\rightarrow$ L+1 0.10; | 4.71   | 0.0634 |
| $S_2(\pi\pi^*)$    | H $\rightarrow$ L+1 0.60; H-1 $\rightarrow$ L 0.19; H $\rightarrow$ L 0.16;   | 4.85   | 0.0058 |
| $S_3(\pi\sigma^*)$ | H $\rightarrow$ L+2 0.89;                                                     | 5.16   | 0.0004 |
| $S_4(\pi\sigma^*)$ | H $\rightarrow$ L+3 0.94;                                                     | 5.59   | 0.0028 |
| $T_1(\pi\pi^*)$    | H $\rightarrow$ L 0.84;                                                       | 3.36   |        |
| $T_2(\pi\pi^*)$    | H $\rightarrow$ L+1 0.69;                                                     | 4.07   |        |
| $T_3(\pi\pi^*)$    | H-1 $\rightarrow$ L 0.80;                                                     | 4.17   |        |
| $T_4(\pi\pi^*)$    | H-1 $\rightarrow$ L+1 0.73; H $\rightarrow$ L+1 0.15;                         | 4.52   |        |
| $T_5(\pi\sigma^*)$ | H $\rightarrow$ L+5 0.41; H-2 $\rightarrow$ L 0.37 H $\rightarrow$ L+1 0.10   | 4.86   |        |
| $T_6(\pi\pi^*)$    | H $\rightarrow$ L+2 0.80;                                                     | 4.88   |        |

**Table S7.** Vertical excitation energies, electronic structure, and oscillator strengths of 3MBT in acetonitrile at ground state minimum geometry obtained at TDA-PBE0/CPCM/def2-TZVPD level of theory. Components of electronic structure with a contribution less than 0.10 are omitted.

| State              | Electronic Structure                                                           | VEE/eV | f(r)   |
|--------------------|--------------------------------------------------------------------------------|--------|--------|
| $S_1(\pi\pi^*)$    | H $\rightarrow$ L 0.66; H-1 $\rightarrow$ L 0.14;                              | 4.70   | 0.1099 |
| $S_2(\pi\pi^*)$    | H $\rightarrow$ L+1 0.62; H $\rightarrow$ L 0.18; H-1 $\rightarrow$ L 0.16;    | 4.83   | 0.0095 |
| $S_3(\pi\sigma^*)$ | H $\rightarrow$ L+2 0.91;                                                      | 5.24   | 0.0000 |
| $S_4(\pi\sigma^*)$ | H $\rightarrow$ L+3 0.96;                                                      | 5.62   | 0.0041 |
| $T_1(\pi\pi^*)$    | H $\rightarrow$ L 0.85;                                                        | 3.38   |        |
| $T_2(\pi\pi^*)$    | H $\rightarrow$ L+1 0.71; H-1 $\rightarrow$ L+1 0.10                           | 4.08   |        |
| $T_3(\pi\pi^*)$    | H-1 $\rightarrow$ L 0.80;                                                      | 4.22   |        |
| $T_4(\pi\pi^*)$    | H-1 $\rightarrow$ L+1 0.71; H $\rightarrow$ L+1 0.15; H-1 $\rightarrow$ L 0.11 | 4.53   |        |
| $T_5(\pi\pi^*)$    | H $\rightarrow$ L+5 0.39; H-2 $\rightarrow$ L 0.38                             | 4.88   |        |
| $T_6(\pi\sigma^*)$ | H $\rightarrow$ L+2 0.83;                                                      | 4.96   |        |



**Table S8.** Vertical excitation energies, electronic structure, and oscillator strengths of 3MBT in cyclohexane at ground state minimum geometry obtained at TDA-PBE0/CPCM/def2-TZVPD level of theory. Components of electronic structure with a contribution less than 0.10 are omitted.

| State              | Electronic Structure                                                        | VEE/eV | f(r)   |
|--------------------|-----------------------------------------------------------------------------|--------|--------|
| $S_1(\pi\pi^*)$    | H $\rightarrow$ L 0.70; H-1 $\rightarrow$ L 0.12;                           | 4.68   | 0.1171 |
| $S_2(\pi\pi^*)$    | H $\rightarrow$ L+1 0.63; H-1 $\rightarrow$ L 0.19; H $\rightarrow$ L 0.14; | 4.83   | 0.0076 |
| $S_3(\pi\sigma^*)$ | H $\rightarrow$ L+2 0.91;                                                   | 5.20   | 0.0000 |
| $S_4(\pi\pi^*)$    | H-1 $\rightarrow$ L 0.55; H $\rightarrow$ L+1 0.25                          | 5.61   | 0.6461 |
| $T_1(\pi\pi^*)$    | H $\rightarrow$ L 0.84;                                                     | 3.37   |        |
| $T_2(\pi\pi^*)$    | H $\rightarrow$ L+1 0.70;                                                   | 4.08   |        |
| $T_3(\pi\pi^*)$    | H-1 $\rightarrow$ L 0.80;                                                   | 4.19   |        |
| $T_4(\pi\pi^*)$    | H-1 $\rightarrow$ L+1 0.72; H $\rightarrow$ L+1 0.15;                       | 4.53   |        |
| $T_5(\pi\pi^*)$    | H $\rightarrow$ L+5 0.40; H-2 $\rightarrow$ L 0.38 H $\rightarrow$ L+1 0.10 | 4.87   |        |
| $T_6(\pi\sigma^*)$ | H $\rightarrow$ L+2 0.82;                                                   | 4.93   |        |

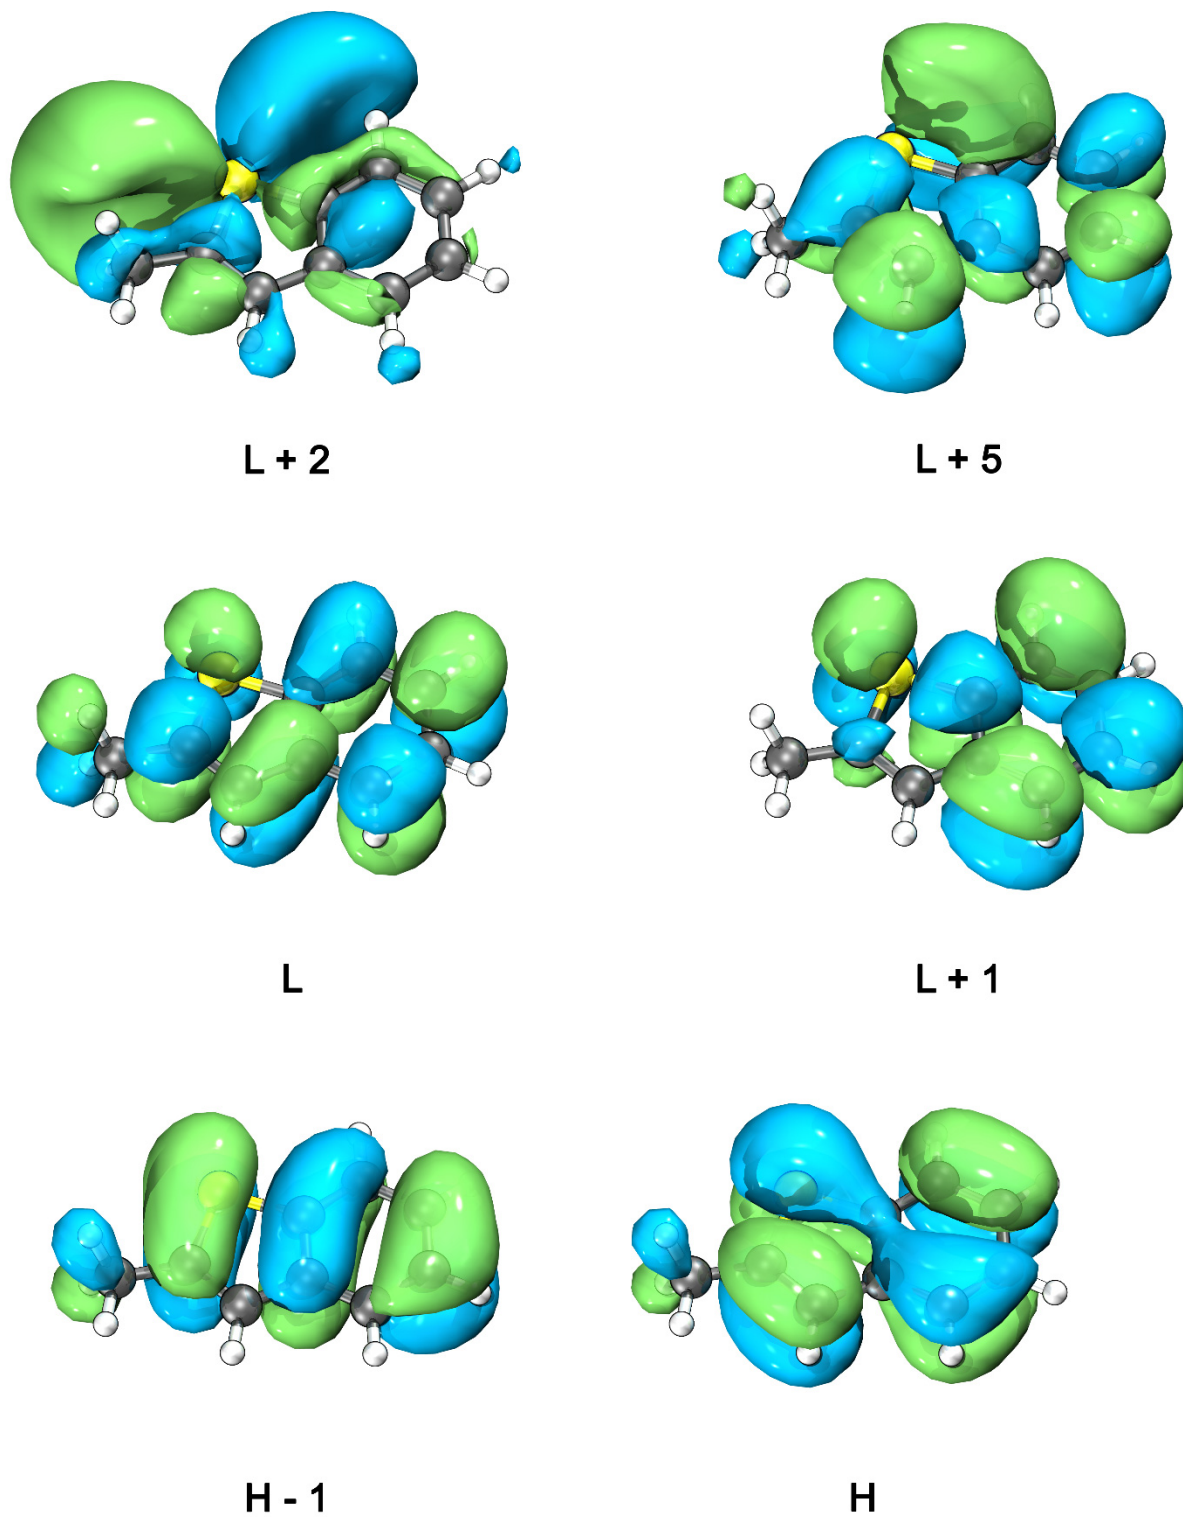

**Figure S14.** Electron density of 2MBT frontier Kohn-Sham orbitals at the  $S_0$  minimum in vacuum, contour value of the isosurfaces was set to 0.02. Visualized by Multiwfn<sup>2</sup> and VMD<sup>3</sup>.

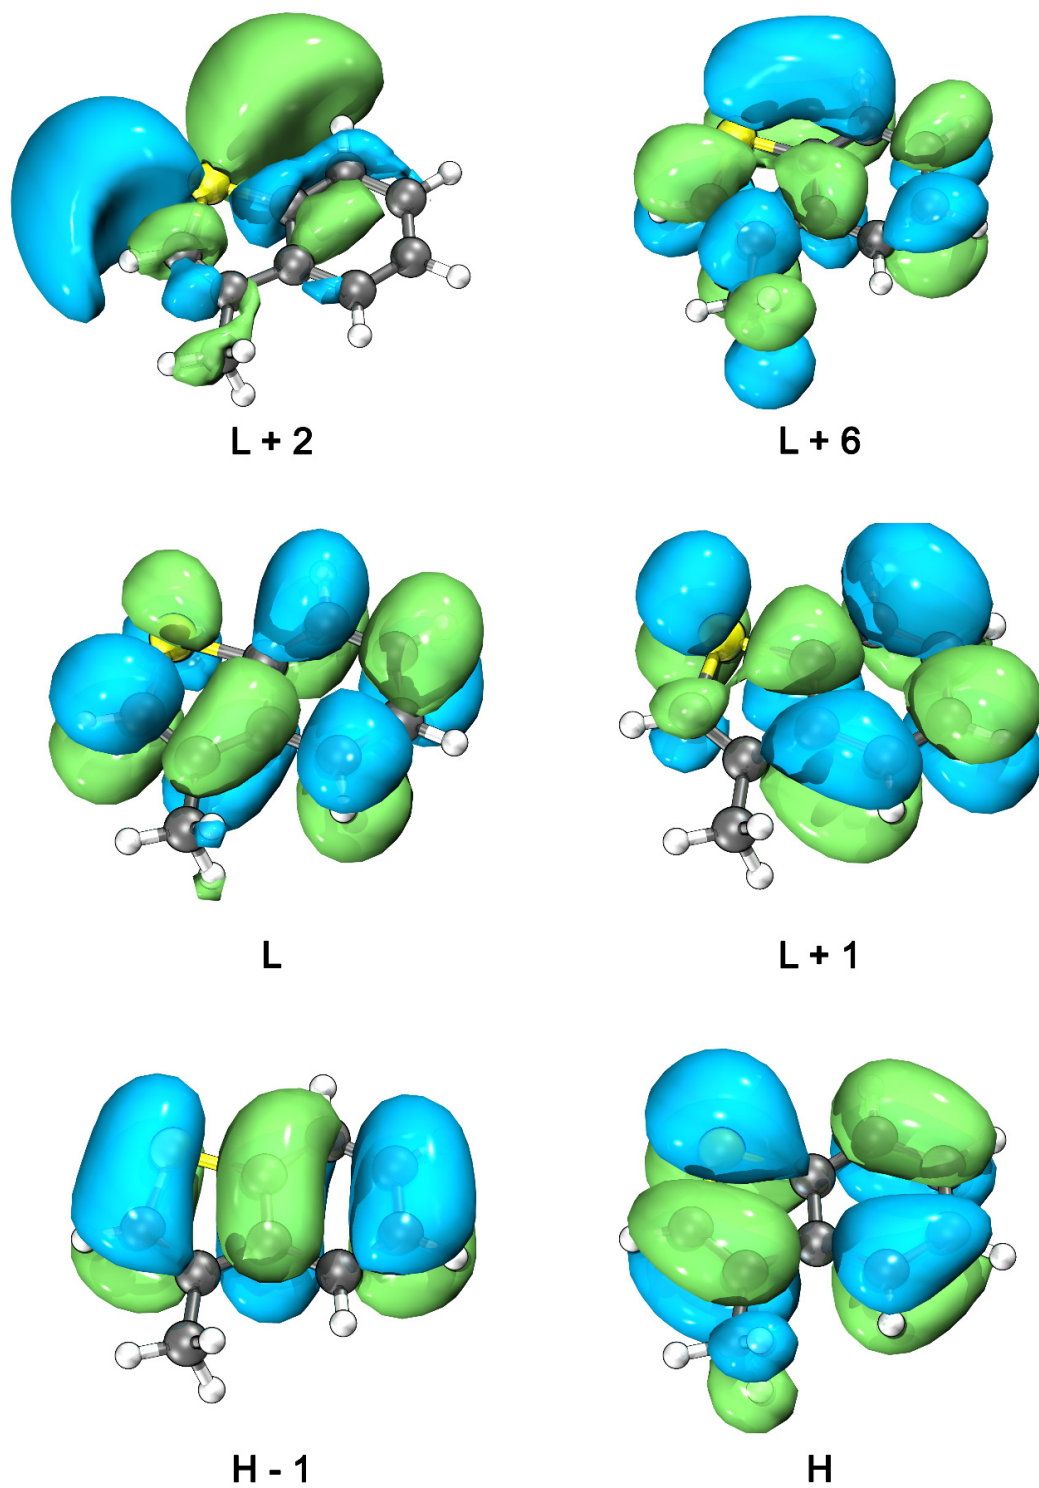

**Figure S15.** Electron density of 3MBT frontier Kohn-Sham orbitals at the  $S_0$  minimum in vacuum, contour value of the isosurfaces was set to 0.02. Visualized by Multiwfn<sup>2</sup> and VMD<sup>3</sup>.

**Table S9.** Vertical energies in acetonitrile at TN  $S_1(\pi\pi^*)$  minimum, S-C2 stretched and S-C7a stretched  $S_1(\pi\sigma^*)$  minima, respectively, relative to the ground state minimum energy.

| $S_1(\pi\pi^*)$ minimum |      |                                                             | S-C2 stretched $S_1(\pi\sigma^*)$ minimum |      |                                                             | S-C7a stretched $S_1(\pi\sigma^*)$ minimum |      |                                                             |
|-------------------------|------|-------------------------------------------------------------|-------------------------------------------|------|-------------------------------------------------------------|--------------------------------------------|------|-------------------------------------------------------------|
| State                   | E/eV | $\langle T_n   \hat{H}_{SO}   S_1 \rangle / \text{cm}^{-1}$ | State                                     | E/eV | $\langle T_n   \hat{H}_{SO}   S_1 \rangle / \text{cm}^{-1}$ | State                                      | E/eV | $\langle T_n   \hat{H}_{SO}   S_1 \rangle / \text{cm}^{-1}$ |
| $S_1(\pi\pi^*)$         | 4.66 | -                                                           | $S_1(\pi\sigma^*)$                        | 4.54 | -                                                           | $S_1(\pi\sigma^*)$                         | 4.16 | -                                                           |
| $T_1(\pi\pi^*)$         | 3.14 | 0.0                                                         | $T_1(\pi\sigma^*)$                        | 4.14 | 0.7                                                         | $T_1(\pi\sigma^*)$                         | 3.82 | 0.2                                                         |
| $T_2(\pi\pi^*)$         | 4.12 | 0.0                                                         | $T_2(\sigma\sigma^*)$                     | 5.00 | 91.4                                                        | $T_2(\sigma\sigma^*)$                      | 4.92 | 73.0                                                        |
| $T_3(\pi\pi^*)$         | 4.34 | 0.0                                                         | $T_3(\pi\sigma^*)$                        | 5.14 | 0.4                                                         | $T_3(\pi\pi^*)$                            | 5.46 | 50.0                                                        |
| $T_4(\pi\pi^*)$         | 4.88 | 0.0                                                         | $T_4(\pi\pi^*)$                           | 5.92 | 42.1                                                        | $T_4(\pi\sigma^*)$                         | 5.58 | 0.6                                                         |
| $T_5(\pi\pi^*)$         | 4.95 | 0.0                                                         |                                           |      |                                                             |                                            |      |                                                             |
| $T_6(\pi\sigma^*)$      | 5.32 | 30.0                                                        |                                           |      |                                                             |                                            |      |                                                             |

**Table S10.** Vertical energies in cyclohexane at TN  $S_1(\pi\pi^*)$  minimum, S-C2 stretched and S-C7a stretched  $S_1(\pi\sigma^*)$  minima, respectively, relative to the ground state minimum energy.

| $S_1(\pi\pi^*)$ minimum |      |                                                             | S-C2 stretched $S_1(\pi\sigma^*)$ minimum |      |                                                             | S-C7a stretched $S_1(\pi\sigma^*)$ minimum |      |                                                             |
|-------------------------|------|-------------------------------------------------------------|-------------------------------------------|------|-------------------------------------------------------------|--------------------------------------------|------|-------------------------------------------------------------|
| State                   | E/eV | $\langle T_n   \hat{H}_{SO}   S_1 \rangle / \text{cm}^{-1}$ | State                                     | E/eV | $\langle T_n   \hat{H}_{SO}   S_1 \rangle / \text{cm}^{-1}$ | State                                      | E/eV | $\langle T_n   \hat{H}_{SO}   S_1 \rangle / \text{cm}^{-1}$ |
| $S_1(\pi\pi^*)$         | 4.64 | -                                                           | $S_1(\pi\sigma^*)$                        | 4.51 | -                                                           | $S_1(\pi\sigma^*)$                         | 4.16 | -                                                           |
| $T_1(\pi\pi^*)$         | 3.13 | 0.0                                                         | $T_1(\pi\sigma^*)$                        | 4.10 | 0.7                                                         | $T_1(\pi\sigma^*)$                         | 3.81 | 0.3                                                         |
| $T_2(\pi\pi^*)$         | 4.12 | 0.0                                                         | $T_2(\sigma\sigma^*)$                     | 5.00 | 92.4                                                        | $T_2(\sigma\sigma^*)$                      | 4.92 | 74.3                                                        |
| $T_3(\pi\pi^*)$         | 4.32 | 0.0                                                         | $T_3(\pi\sigma^*)$                        | 5.18 | 0.3                                                         | $T_3(\pi\pi^*)$                            | 5.46 | 51.4                                                        |
| $T_4(\pi\pi^*)$         | 4.88 | 0.0                                                         | $T_4(\pi\pi^*)$                           | 5.93 | 43.5                                                        | $T_4(\pi\sigma^*)$                         | 5.62 | 0.6                                                         |
| $T_5(\pi\pi^*)$         | 4.94 | 0.0                                                         |                                           |      |                                                             |                                            |      |                                                             |
| $T_6(\pi\sigma^*)$      | 5.27 | 22.6                                                        |                                           |      |                                                             |                                            |      |                                                             |

**Table S11.** Vertical energies in vacuum at 2MBT  $S_1(\pi\pi^*)$  minimum, S-C2 stretched and S-C7a stretched  $S_1(\pi\sigma^*)$  minima, respectively, relative to the ground state minimum energy.

| $S_1(\pi\pi^*)$ minimum |      |                                                             | S-C2 stretched $S_1(\pi\sigma^*)$ minimum |      |                                                             | S-C7a stretched $S_1(\pi\sigma^*)$ minimum |      |                                                             |
|-------------------------|------|-------------------------------------------------------------|-------------------------------------------|------|-------------------------------------------------------------|--------------------------------------------|------|-------------------------------------------------------------|
| State                   | E/eV | $\langle T_n   \hat{H}_{SO}   S_1 \rangle / \text{cm}^{-1}$ | State                                     | E/eV | $\langle T_n   \hat{H}_{SO}   S_1 \rangle / \text{cm}^{-1}$ | State                                      | E/eV | $\langle T_n   \hat{H}_{SO}   S_1 \rangle / \text{cm}^{-1}$ |
| $S_1(\pi\pi^*)$         | 4.65 | -                                                           | $S_1(\pi\sigma^*)$                        | 4.28 | -                                                           | $S_1(\pi\sigma^*)$                         | 4.14 | -                                                           |
| $T_1(\pi\pi^*)$         | 3.27 | 0.0                                                         | $T_1(\pi\sigma^*)$                        | 3.88 | 0.6                                                         | $T_1(\pi\sigma^*)$                         | 3.80 | 0.3                                                         |
| $T_2(\pi\pi^*)$         | 4.00 | 0.0                                                         | $T_2(\sigma\sigma^*)$                     | 4.69 | 93.2                                                        | $T_2(\sigma\sigma^*)$                      | 5.01 | 68.1                                                        |
| $T_3(\pi\pi^*)$         | 4.10 | 0.0                                                         | $T_3(\pi\sigma^*)$                        | 5.00 | 1.5                                                         | $T_3(\pi\pi^*)$                            | 5.41 | 49.0                                                        |
| $T_4(\pi\pi^*)$         | 4.93 | 0.0                                                         | $T_4(\pi\pi^*)$                           | 5.74 | 39.5                                                        | $T_4(\pi\sigma^*)$                         | 5.54 | 0.6                                                         |
| $T_5(\pi\pi^*)$         | 5.05 | 0.1                                                         |                                           |      |                                                             |                                            |      |                                                             |
| $T_6(\pi\sigma^*)$      | 5.49 | 25.8                                                        |                                           |      |                                                             |                                            |      |                                                             |

**Table S12.** Vertical energies in acetonitrile at 2MBT  $S_1(\pi\pi^*)$  minimum, S-C2 stretched and S-C7a stretched  $S_1(\pi\sigma^*)$  minima, respectively, relative to the ground state minimum energy.

| $S_1(\pi\pi^*)$ minimum |      |                                                             | S-C2 stretched $S_1(\pi\sigma^*)$ minimum |      |                                                             | S-C7a stretched $S_1(\pi\sigma^*)$ minimum |      |                                                             |
|-------------------------|------|-------------------------------------------------------------|-------------------------------------------|------|-------------------------------------------------------------|--------------------------------------------|------|-------------------------------------------------------------|
| State                   | E/eV | $\langle T_n   \hat{H}_{SO}   S_1 \rangle / \text{cm}^{-1}$ | State                                     | E/eV | $\langle T_n   \hat{H}_{SO}   S_1 \rangle / \text{cm}^{-1}$ | State                                      | E/eV | $\langle T_n   \hat{H}_{SO}   S_1 \rangle / \text{cm}^{-1}$ |
| $S_1(\pi\pi^*)$         | 4.63 | -                                                           | $S_1(\pi\sigma^*)$                        | 4.34 | -                                                           | $S_1(\pi\sigma^*)$                         | 4.13 | -                                                           |
| $T_1(\pi\pi^*)$         | 3.28 | 0.0                                                         | $T_1(\pi\sigma^*)$                        | 3.96 | 0.6                                                         | $T_1(\pi\sigma^*)$                         | 3.81 | 0.3                                                         |
| $T_2(\pi\pi^*)$         | 4.03 | 0.0                                                         | $T_2(\sigma\sigma^*)$                     | 4.71 | 90.7                                                        | $T_2(\sigma\sigma^*)$                      | 5.01 | 65.3                                                        |
| $T_3(\pi\pi^*)$         | 4.12 | 0.0                                                         | $T_3(\pi\sigma^*)$                        | 4.93 | 1.8                                                         | $T_3(\pi\pi^*)$                            | 5.41 | 46.8                                                        |
| $T_4(\pi\pi^*)$         | 4.94 | 0.0                                                         | $T_4(\pi\pi^*)$                           | 5.69 | 36.5                                                        | $T_4(\pi\sigma^*)$                         | 5.51 | 0.6                                                         |
| $T_5(\pi\pi^*)$         | 5.16 | 0.1                                                         |                                           |      |                                                             |                                            |      |                                                             |
| $T_6(\pi\sigma^*)$      | 5.59 | 26.0                                                        |                                           |      |                                                             |                                            |      |                                                             |

**Table S13.** Vertical energies in cyclohexane at 2MBT  $S_1(\pi\pi^*)$  minimum, S-C2 stretched and S-C7a stretched  $S_1(\pi\sigma^*)$  minima, respectively, relative to the ground state minimum energy.

| $S_1(\pi\pi^*)$ minimum |      |                                                              | S-C2 stretched $S_1(\pi\sigma^*)$ minimum |      |                                                              | S-C7a stretched $S_1(\pi\sigma^*)$ minimum |      |                                                              |
|-------------------------|------|--------------------------------------------------------------|-------------------------------------------|------|--------------------------------------------------------------|--------------------------------------------|------|--------------------------------------------------------------|
| State                   | E/eV | $\langle T_n   \hat{H}_{S_0}   S_1 \rangle / \text{cm}^{-1}$ | State                                     | E/eV | $\langle T_n   \hat{H}_{S_0}   S_1 \rangle / \text{cm}^{-1}$ | State                                      | E/eV | $\langle T_n   \hat{H}_{S_0}   S_1 \rangle / \text{cm}^{-1}$ |
| $S_1(\pi\pi^*)$         | 4.62 | -                                                            | $S_1(\pi\sigma^*)$                        | 4.31 | -                                                            | $S_1(\pi\sigma^*)$                         | 4.14 | -                                                            |
| $T_1(\pi\pi^*)$         | 3.28 | 0.0                                                          | $T_1(\pi\sigma^*)$                        | 3.92 | 0.7                                                          | $T_1(\pi\sigma^*)$                         | 3.81 | 0.3                                                          |
| $T_2(\pi\pi^*)$         | 4.02 | 0.0                                                          | $T_2(\sigma\sigma^*)$                     | 4.70 | 92.5                                                         | $T_2(\sigma\sigma^*)$                      | 5.01 | 67.1                                                         |
| $T_3(\pi\pi^*)$         | 4.11 | 0.0                                                          | $T_3(\pi\sigma^*)$                        | 4.98 | 1.5                                                          | $T_3(\pi\pi^*)$                            | 5.41 | 48.0                                                         |
| $T_4(\pi\pi^*)$         | 4.40 | 0.0                                                          | $T_4(\pi\pi^*)$                           | 5.72 | 38.3                                                         | $T_4(\pi\sigma^*)$                         | 5.53 | 0.6                                                          |
| $T_5(\pi\pi^*)$         | 4.94 | 0.1                                                          |                                           |      |                                                              |                                            |      |                                                              |
| $T_6(\pi\sigma^*)$      | 5.10 | 26.0                                                         |                                           |      |                                                              |                                            |      |                                                              |

**Table S14.** Vertical energies in vacuum at 3MBT  $S_1(\pi\pi^*)$  minimum, S-C2 stretched and S-C7a stretched  $S_1(\pi\sigma^*)$  minima, respectively, relative to the ground state minimum energy.

| $S_1(\pi\pi^*)$ minimum |      |                                                              | S-C2 stretched $S_1(\pi\sigma^*)$ minimum |      |                                                              | S-C7a stretched $S_1(\pi\sigma^*)$ minimum |      |                                                              |
|-------------------------|------|--------------------------------------------------------------|-------------------------------------------|------|--------------------------------------------------------------|--------------------------------------------|------|--------------------------------------------------------------|
| State                   | E/eV | $\langle T_n   \hat{H}_{S_0}   S_1 \rangle / \text{cm}^{-1}$ | State                                     | E/eV | $\langle T_n   \hat{H}_{S_0}   S_1 \rangle / \text{cm}^{-1}$ | State                                      | E/eV | $\langle T_n   \hat{H}_{S_0}   S_1 \rangle / \text{cm}^{-1}$ |
| $S_1(\pi\pi^*)$         | 4.52 | -                                                            | $S_1(\pi\sigma^*)$                        | 4.55 | -                                                            | $S_1(\pi\sigma^*)$                         | 4.11 | -                                                            |
| $T_1(\pi\pi^*)$         | 3.17 | 0.0                                                          | $T_1(\pi\sigma^*)$                        | 4.13 | 0.8                                                          | $T_1(\pi\sigma^*)$                         | 3.75 | 0.3                                                          |
| $T_2(\pi\pi^*)$         | 4.07 | 0.0                                                          | $T_2(\sigma\sigma^*)$                     | 5.14 | 91.5                                                         | $T_2(\sigma\sigma^*)$                      | 5.05 | 67.8                                                         |
| $T_3(\pi\pi^*)$         | 4.46 | 0.0                                                          | $T_3(\pi\sigma^*)$                        | 5.16 | 5.9                                                          | $T_3(\pi\pi^*)$                            | 5.28 | 61.8                                                         |
| $T_4(\pi\pi^*)$         | 4.84 | 0.0                                                          | $T_4(\pi\pi^*)$                           | 5.88 | 46.4                                                         | $T_4(\pi\sigma^*)$                         | 5.65 | 0.5                                                          |
| $T_5(\pi\pi^*)$         | 4.92 | 0.0                                                          |                                           |      |                                                              |                                            |      |                                                              |
| $T_6(\pi\sigma^*)$      | 5.17 | 9.7                                                          |                                           |      |                                                              |                                            |      |                                                              |

**Table S15.** Vertical energies in acetonitrile at 3MBT  $S_1(\pi\pi^*)$  minimum, S-C2 stretched and S-C7a stretched  $S_1(\pi\sigma^*)$  minima, respectively, relative to the ground state minimum energy.

| $S_1(\pi\pi^*)$ minimum |      |                                                             | S-C2 stretched $S_1(\pi\sigma^*)$ minimum |      |                                                             | S-C7a stretched $S_1(\pi\sigma^*)$ minimum |      |                                                             |
|-------------------------|------|-------------------------------------------------------------|-------------------------------------------|------|-------------------------------------------------------------|--------------------------------------------|------|-------------------------------------------------------------|
| State                   | E/eV | $\langle T_n   \hat{H}_{SO}   S_1 \rangle / \text{cm}^{-1}$ | State                                     | E/eV | $\langle T_n   \hat{H}_{SO}   S_1 \rangle / \text{cm}^{-1}$ | State                                      | E/eV | $\langle T_n   \hat{H}_{SO}   S_1 \rangle / \text{cm}^{-1}$ |
| $S_1(\pi\pi^*)$         | 4.50 | -                                                           | $S_1(\pi\sigma^*)$                        | 4.62 | -                                                           | $S_1(\pi\sigma^*)$                         | 4.09 | -                                                           |
| $T_1(\pi\pi^*)$         | 3.19 | 0.0                                                         | $T_1(\pi\sigma^*)$                        | 4.21 | 0.8                                                         | $T_1(\pi\sigma^*)$                         | 3.76 | 0.3                                                         |
| $T_2(\pi\pi^*)$         | 4.07 | 0.0                                                         | $T_2(\pi\sigma^*)$                        | 5.08 | 1.6                                                         | $T_2(\sigma\sigma^*)$                      | 5.05 | 66.4                                                        |
| $T_3(\pi\pi^*)$         | 4.50 | 0.0                                                         | $T_3(\sigma\sigma^*)$                     | 5.15 | 90.2                                                        | $T_3(\pi\pi^*)$                            | 5.28 | 58.6                                                        |
| $T_4(\pi\pi^*)$         | 4.84 | 0.0                                                         | $T_4(\pi\pi^*)$                           | 5.87 | 43.9                                                        | $T_4(\pi\sigma^*)$                         | 5.60 | 0.5                                                         |
| $T_5(\pi\pi^*)$         | 4.93 | 0.0                                                         |                                           |      |                                                             |                                            |      |                                                             |
| $T_6(\pi\sigma^*)$      | 5.24 | 9.8                                                         |                                           |      |                                                             |                                            |      |                                                             |

**Table S16.** Vertical energies in cyclohexane at 3MBT  $S_1(\pi\pi^*)$  minimum, S-C2 stretched and S-C7a stretched  $S_1(\pi\sigma^*)$  minima, respectively, relative to the ground state minimum energy.

| $S_1(\pi\pi^*)$ minimum |      |                                                             | S-C2 stretched $S_1(\pi\sigma^*)$ minimum |      |                                                             | S-C7a stretched $S_1(\pi\sigma^*)$ minimum |      |                                                             |
|-------------------------|------|-------------------------------------------------------------|-------------------------------------------|------|-------------------------------------------------------------|--------------------------------------------|------|-------------------------------------------------------------|
| State                   | E/eV | $\langle T_n   \hat{H}_{SO}   S_1 \rangle / \text{cm}^{-1}$ | State                                     | E/eV | $\langle T_n   \hat{H}_{SO}   S_1 \rangle / \text{cm}^{-1}$ | State                                      | E/eV | $\langle T_n   \hat{H}_{SO}   S_1 \rangle / \text{cm}^{-1}$ |
| $S_1(\pi\pi^*)$         | 4.48 | -                                                           | $S_1(\pi\sigma^*)$                        | 4.58 | -                                                           | $S_1(\pi\sigma^*)$                         | 4.09 | -                                                           |
| $T_1(\pi\pi^*)$         | 3.18 | 0.0                                                         | $T_1(\pi\sigma^*)$                        | 4.17 | 0.8                                                         | $T_1(\pi\sigma^*)$                         | 3.76 | 0.3                                                         |
| $T_2(\pi\pi^*)$         | 4.07 | 0.0                                                         | $T_2(\pi\sigma^*)$                        | 5.13 | 9.5                                                         | $T_2(\sigma\sigma^*)$                      | 5.05 | 67.4                                                        |
| $T_3(\pi\pi^*)$         | 4.48 | 0.0                                                         | $T_3(\sigma\sigma^*)$                     | 5.14 | 90.8                                                        | $T_3(\pi\pi^*)$                            | 5.28 | 60.4                                                        |
| $T_4(\pi\pi^*)$         | 4.84 | 0.0                                                         | $T_4(\pi\pi^*)$                           | 5.87 | 45.4                                                        | $T_4(\pi\sigma^*)$                         | 5.60 | 0.5                                                         |
| $T_5(\pi\pi^*)$         | 4.92 | 0.0                                                         |                                           |      |                                                             |                                            |      |                                                             |
| $T_6(\pi\sigma^*)$      | 5.20 | 10.4                                                        |                                           |      |                                                             |                                            |      |                                                             |

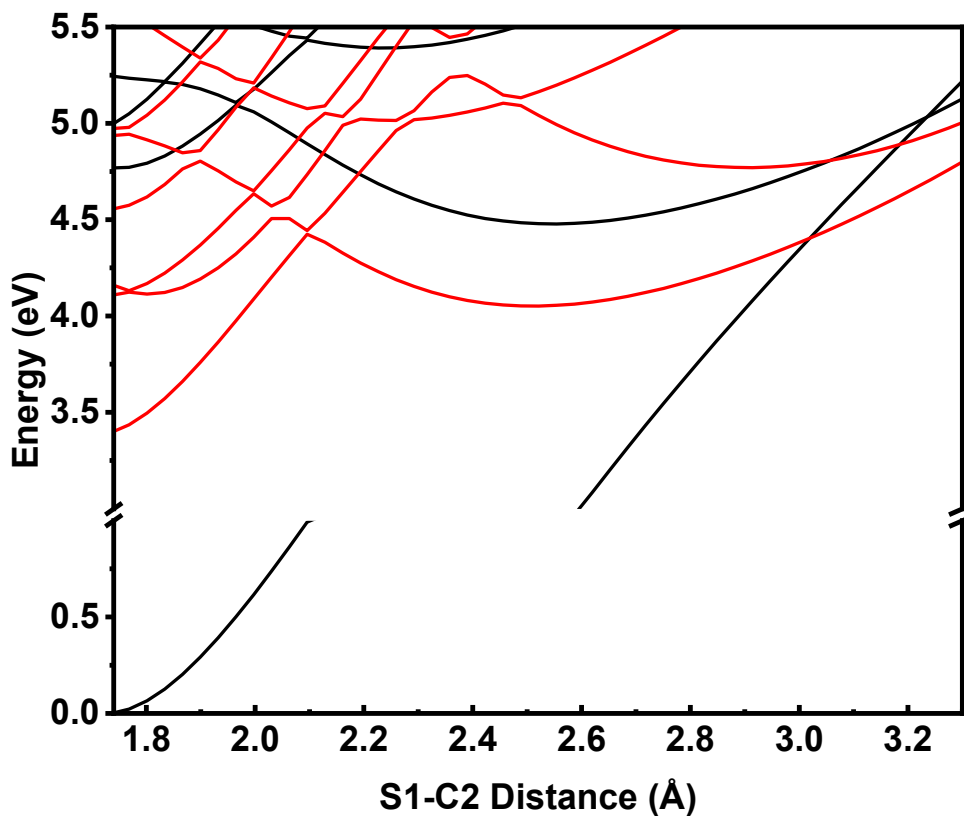

**Figure S16.** Single point energy of linear interpolated geometries between TN ground state minimum and S-C2 stretched  $S_1(\pi\sigma^*)$  minimum in the vacuum. Points of each step are connected with straight lines. Singlet states are black lines and triplet states are red lines. The horizontal break is introduced to better highlight the excited state topography.



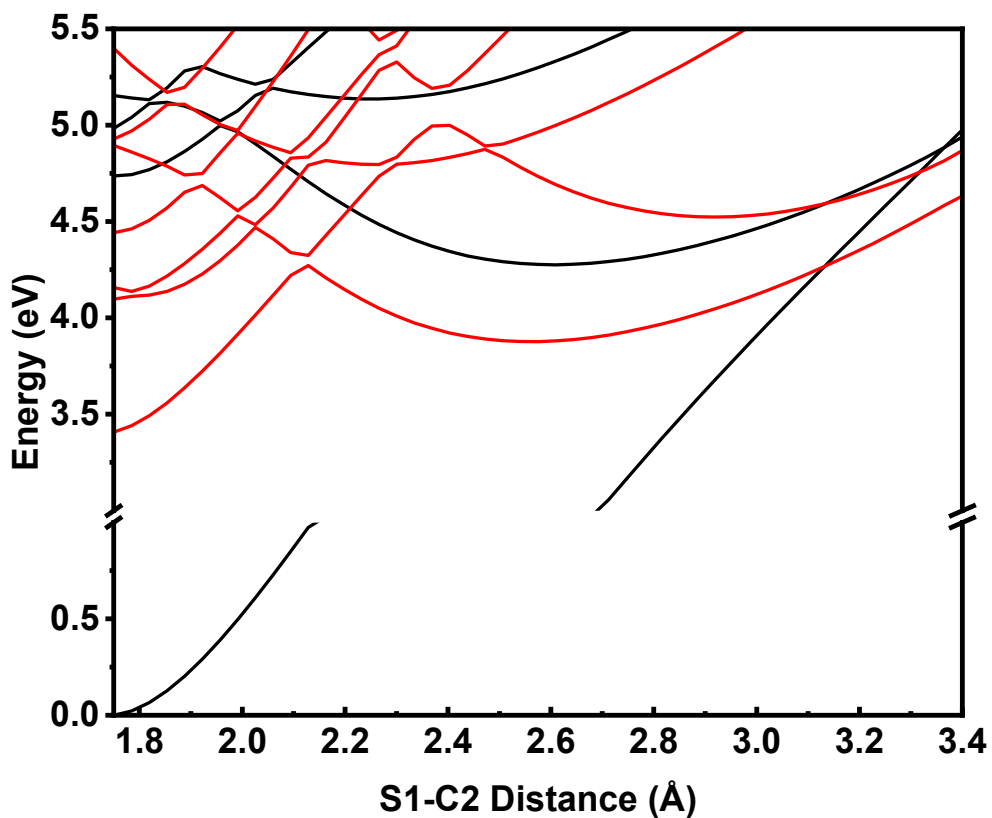

**Figure S17.** Single point energy of linear interpolated geometries between 2MBT ground state minimum and S-C2 stretched  $S_1(\pi\sigma^*)$  minimum in the vacuum. Points of each step are connected with straight lines. Singlet states are black lines and triplet states are red lines. The horizontal break is introduced to better highlight the excited state topography.

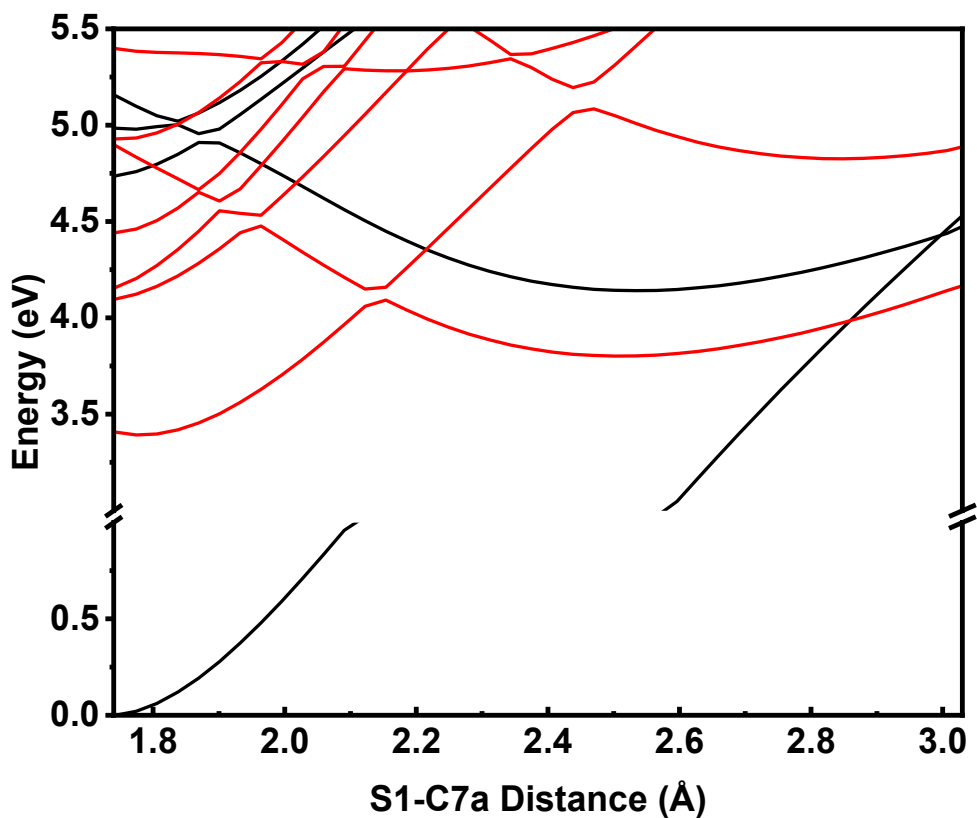

**Figure S18.** Single point energy of linear interpolated geometries between 2MBT ground state minimum and S-C7a stretched  $S_1(\pi\sigma^*)$  minimum in the vacuum. Points of each step are connected with straight lines. Singlet states are black lines and triplet states are red lines. The horizontal break is introduced to better highlight the excited state topography.

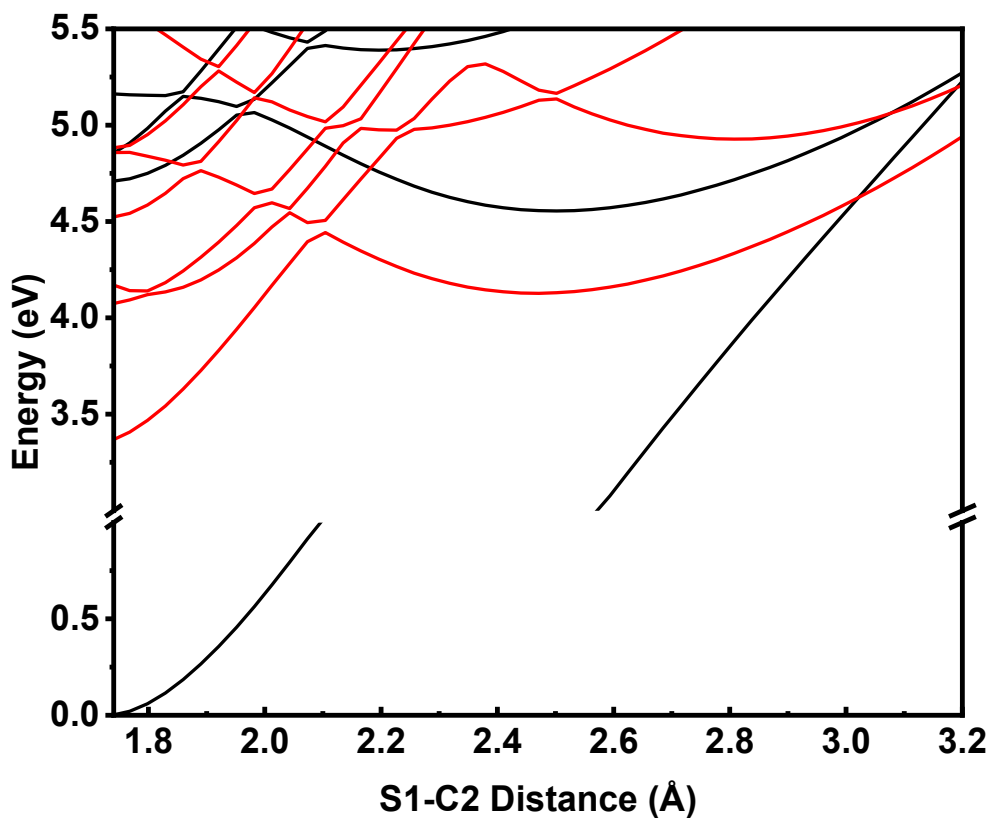

**Figure S19.** Single point energy of linear interpolated geometries between 3MBT ground state minimum and S-C2 stretched  $S_1(\pi\sigma^*)$  minimum in the vacuum. Points of each step are connected with straight lines. Singlet states are black lines and triplet states are red lines. The horizontal break is introduced to better highlight the excited state topography.

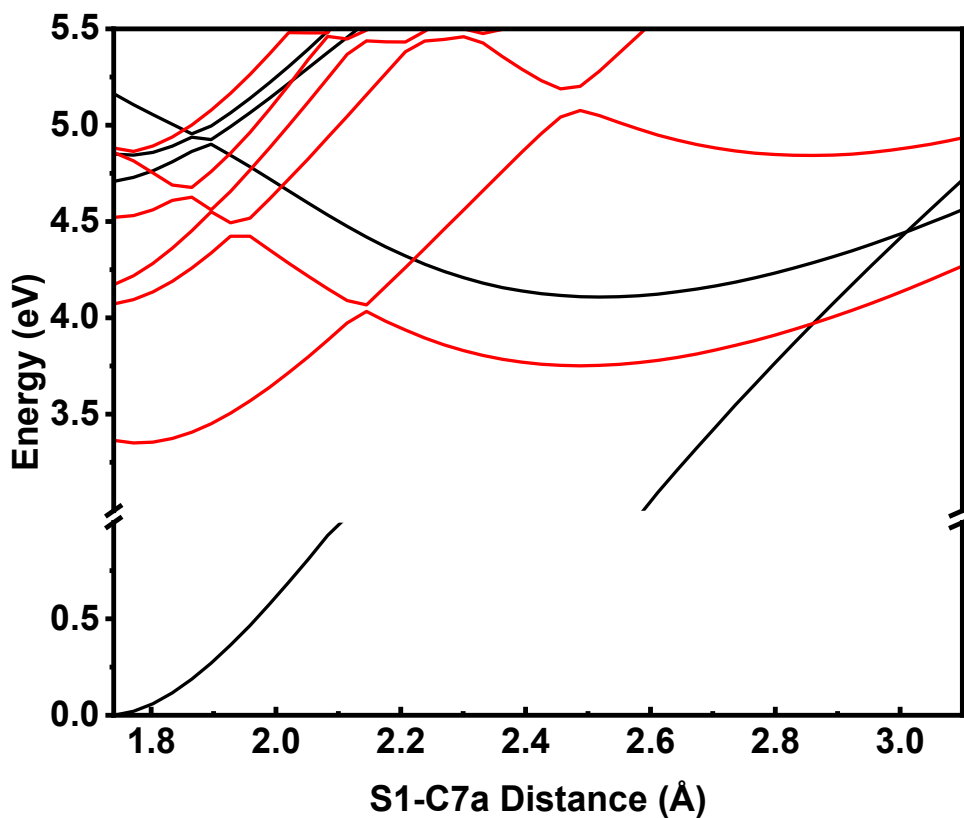

**Figure S20.** Single point energy of linear interpolated geometries between 3MBT ground state minimum and S-C7a stretched  $S_1(\pi\sigma^*)$  minimum in the vacuum. Points of each step are connected with straight lines. Singlet states are black lines and triplet states are red lines. The horizontal break is introduced to better highlight the excited state topography.

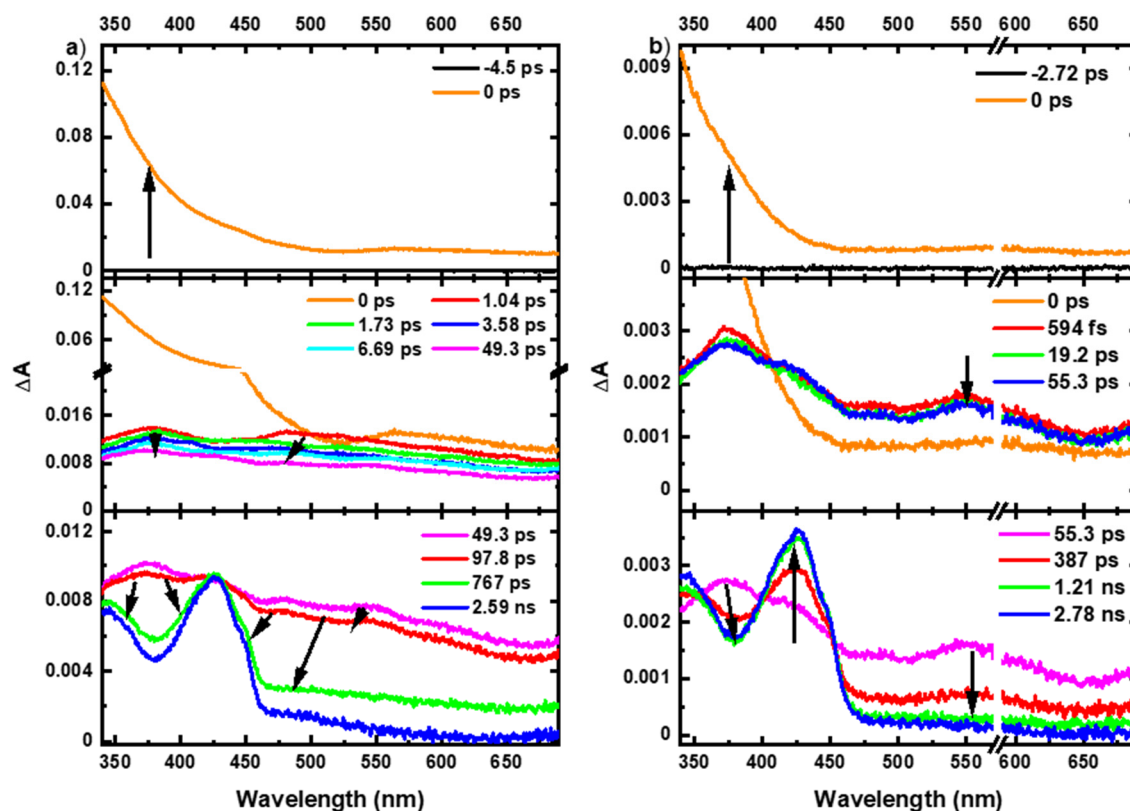

**Figure S21.** Spectral evolution of the transient absorption spectra of thianaphthene in cyclohexane after excitation of (a) 266 nm and (b) 290 nm. Breaks on the horizontal axis were used to exclude the overtone signal produced from the excitation source. The arrows displayed in these figures are not used to highlight specific wavelengths but to draw attention to trends. The spectra at a time delay of 0 ps is due to the coherent signal of the solvent.

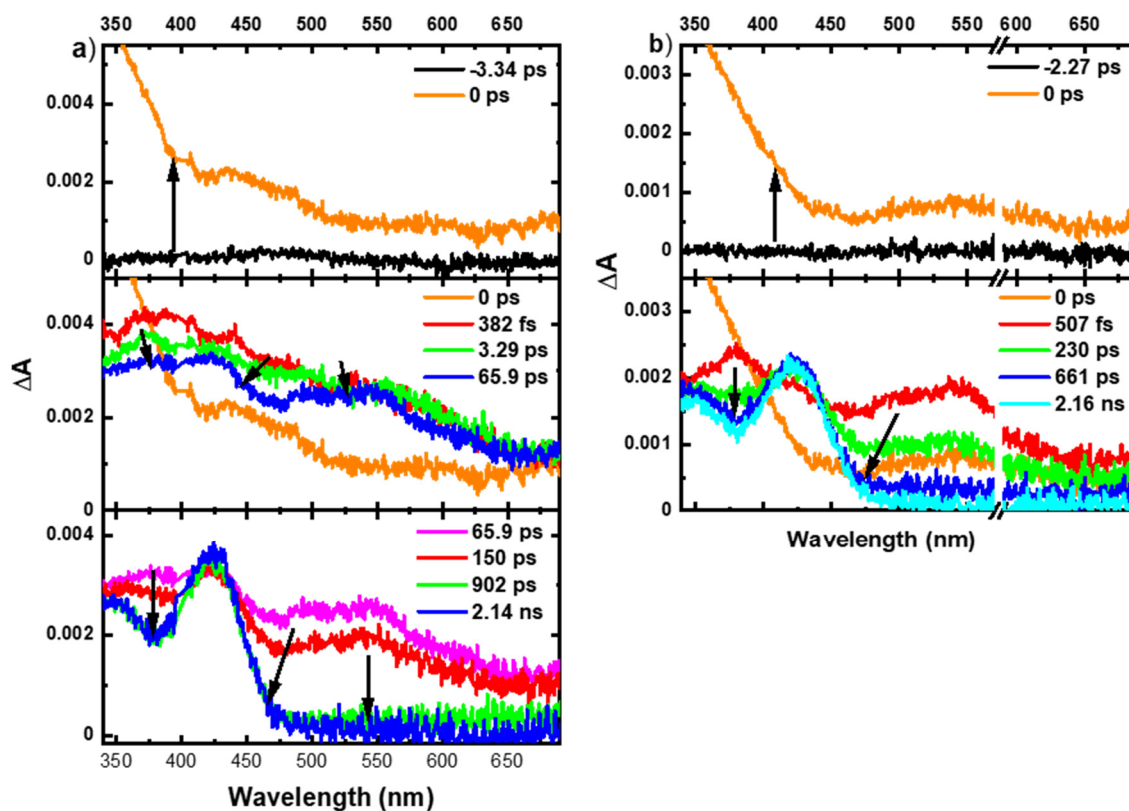

**Figure S22.** Spectral evolution of the transient absorption spectra of 2-methylbenzothiophene in cyclohexane after excitation of (a) 266 nm and (b) 290 nm. Breaks on the horizontal axis were used to exclude the overtone signal produced from the excitation source. The arrows displayed in these figures are not used to highlight specific wavelengths but to draw attention to trends. The spectra at a time delay of 0 ps is due to the coherent signal of the solvent.

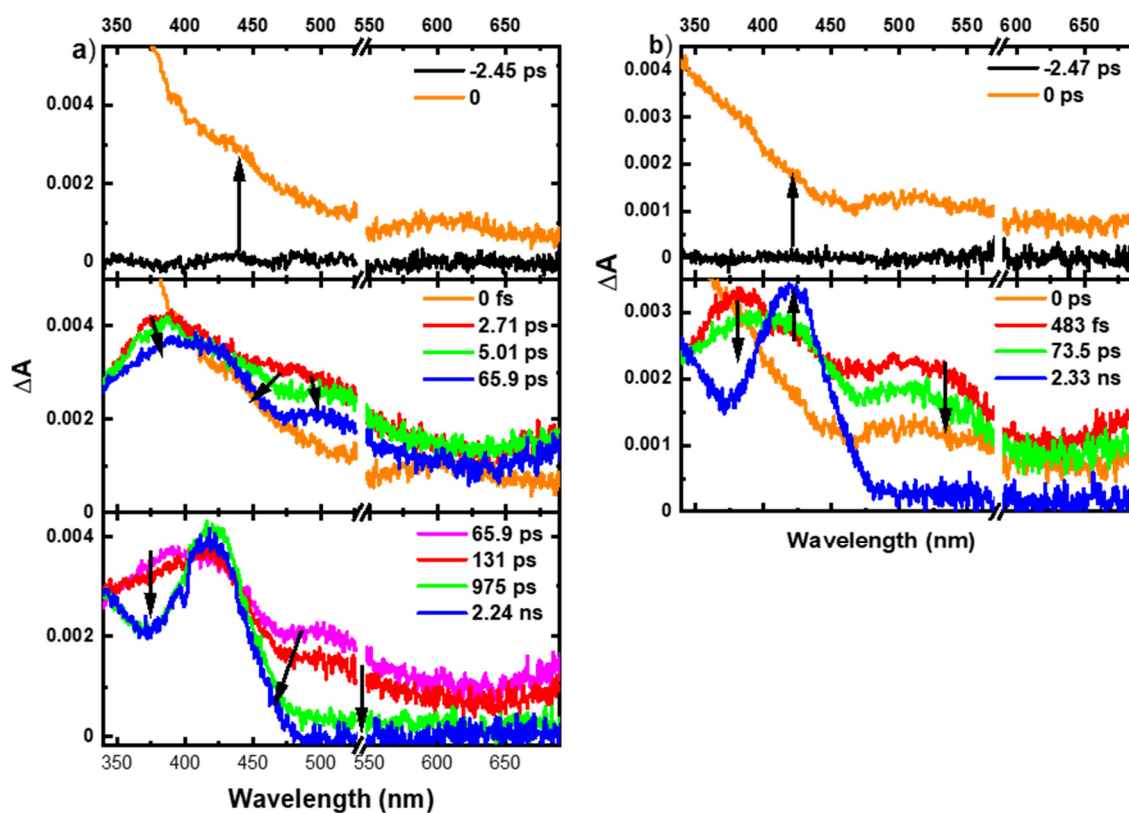

**Figure S23.** Spectral evolution of the transient absorption spectra of 3-methylbenzothiophene in cyclohexane after excitation of (a) 266 nm and (b) 290 nm. Breaks on the horizontal axis were used to exclude the overtone signal produced from the excitation source. The arrows displayed in these figures are not used to highlight specific wavelengths but to draw attention to trends. The spectra at a time delay of 0 ps is due to the coherent signal of the solvent.

**Table S17.** Band peaks of EADS of TN, 2MBT, and 3MBT obtained from femtosecond broadband transient absorption measurements in cyclohexane and acetonitrile. Values in parentheses indicate shoulders.

| Compound    | Solvent      | Ex. $\lambda$<br>(nm) | EADS1 ( $\lambda_{\text{abs}}/\text{nm}$ ) | EADS2 ( $\lambda_{\text{abs}}/\text{nm}$ ) | EADS3<br>( $\lambda_{\text{abs}}/\text{nm}$ ) |
|-------------|--------------|-----------------------|--------------------------------------------|--------------------------------------------|-----------------------------------------------|
| <b>TN</b>   | Acetonitrile | 266                   | 370, (445), 558                            | 353, 548                                   | 421                                           |
|             |              | 290                   | 376, (485), 548                            | 382, 541                                   | 422                                           |
|             | Cyclohexane  | 266                   | 378, 557                                   | 483, 549                                   | 425                                           |
|             |              | 290                   | 373, 485, 550                              | 377, 485, 550                              | 425                                           |
| <b>2MBT</b> | Acetonitrile | 266                   | 372, 523                                   | 375, 509                                   | 418                                           |
|             |              | 290                   | -                                          | 377, 540                                   | 417                                           |
|             | Cyclohexane  | 266                   | 382, (423), 546                            | 377, (419), 498, 545                       | 423                                           |
|             |              | 290                   | -                                          | 377, (419), 498, 545                       | 423                                           |
| <b>3MBT</b> | Acetonitrile | 266                   | 373, (500)                                 | 372, 497                                   | 417                                           |
|             |              | 290                   | -                                          | 380, 493                                   | 416                                           |
|             | Cyclohexane  | 266                   | 388, (494)                                 | 384, 502                                   | 420                                           |
|             |              | 290                   | -                                          | 384, 502                                   | 420                                           |



## Cartesian Coordinates of Optimized Geometries of Thianapthene Derivatives in Angstrom

### Thianapthene Ground State Geometry

|   |             |             |             |
|---|-------------|-------------|-------------|
| C | -3.97754971 | 2.46994205  | 0.00019918  |
| C | -5.06171040 | 1.61637047  | 0.00029748  |
| C | -4.88253403 | 0.22775757  | 0.00005642  |
| C | -3.61857468 | -0.32120128 | -0.00025123 |
| C | -2.50007267 | 0.51989259  | -0.00033923 |
| C | -2.70030388 | 1.91579645  | -0.00013636 |
| H | -4.11696423 | 3.54448214  | 0.00020935  |
| H | -6.06436208 | 2.02732998  | 0.00047037  |
| H | -5.75050491 | -0.42094360 | 0.00013304  |
| H | -3.48438124 | -1.39716359 | -0.00033656 |
| C | -1.10934038 | 0.18524798  | -0.00027826 |
| C | -0.31267777 | 1.27873796  | 0.00028604  |
| S | -1.19290710 | 2.75914022  | -0.00097548 |
| H | -0.73316622 | -0.82936933 | -0.00011985 |
| H | 0.76689929  | 1.30647040  | 0.00078510  |

### Thianapthene $S_1(\pi\pi^*)$ Geometry

|   |             |             |             |
|---|-------------|-------------|-------------|
| C | -3.96453617 | 2.48325450  | 0.00008081  |
| C | -5.10315880 | 1.60046845  | 0.00005285  |
| C | -4.91117550 | 0.24083573  | 0.00002333  |
| C | -3.62126987 | -0.33757683 | -0.00001043 |
| C | -2.48801045 | 0.51115688  | -0.00006013 |
| C | -2.71137025 | 1.90843120  | 0.00004898  |
| H | -4.09629718 | 3.55737460  | 0.00012421  |
| H | -6.10142726 | 2.01773140  | 0.00005437  |
| H | -5.77272064 | -0.41755751 | 0.00003076  |
| H | -3.50095088 | -1.41381772 | 0.00001104  |

|   |             |             |             |
|---|-------------|-------------|-------------|
| C | -1.11128482 | 0.19042645  | -0.00013361 |
| C | -0.25584387 | 1.30079273  | 0.00002647  |
| S | -1.18268078 | 2.73325416  | 0.00020045  |
| H | -0.73773459 | -0.82631946 | -0.00030062 |
| H | 0.82031101  | 1.33403542  | -0.00014848 |

**Thianapthene S<sub>1</sub>( $\pi\sigma^*$ ), S-C2 Elongation Geometry**

|   |             |             |            |
|---|-------------|-------------|------------|
| C | -4.90097597 | 2.84020443  | 0.55036819 |
| C | -5.92662876 | 1.93516378  | 0.55417782 |
| C | -5.64011925 | 0.56254437  | 0.56408362 |
| C | -4.32918441 | 0.11338689  | 0.57006210 |
| C | -3.26550367 | 1.00242644  | 0.56643130 |
| C | -3.54349536 | 2.41291873  | 0.55625972 |
| H | -5.09394560 | 3.90564138  | 0.54275237 |
| H | -6.95520670 | 2.27432636  | 0.54959007 |
| H | -6.45251274 | -0.15499758 | 0.56710936 |
| H | -4.12263861 | -0.95125098 | 0.57773138 |
| C | -1.88617999 | 0.54796826  | 0.57260232 |
| C | -0.89806059 | 1.41793286  | 0.56875952 |
| S | -2.30911306 | 3.54711382  | 0.55124877 |
| H | -1.73368405 | -0.53702585 | 0.58042798 |
| H | 0.17378871  | 1.24780707  | 0.57229547 |

**Thianapthene S<sub>1</sub>( $\pi\sigma^*$ ), S-C7a Elongation Geometry**

|   |             |            |            |
|---|-------------|------------|------------|
| C | -4.83536407 | 2.88059131 | 0.56958621 |
| C | -5.89759307 | 1.96573496 | 0.56336381 |
| C | -5.65749690 | 0.59368691 | 0.56242872 |
| C | -4.36167978 | 0.12084184 | 0.56765916 |
| C | -3.28630025 | 1.03453076 | 0.57393831 |
| C | -3.55464164 | 2.40486052 | 0.57474749 |

|   |             |             |            |
|---|-------------|-------------|------------|
| H | -5.04661757 | 3.94618215  | 0.57019998 |
| H | -6.92089421 | 2.32864600  | 0.55921682 |
| H | -6.48990975 | -0.09949624 | 0.55758885 |
| H | -4.16334849 | -0.94687693 | 0.56697958 |
| C | -1.93355239 | 0.62144603  | 0.57951068 |
| C | -0.89104838 | 1.55043496  | 0.58565522 |
| S | -1.10374307 | 3.19139892  | 0.58712907 |
| H | -1.69125723 | -0.43696911 | 0.57904949 |
| H | 0.12696681  | 1.16845792  | 0.58973661 |

**Thianapthene T<sub>1</sub>( $\pi\pi^*$ ) Geometry**

|   |             |             |             |
|---|-------------|-------------|-------------|
| C | -3.94346015 | 2.46599006  | -0.00061622 |
| C | -5.07526032 | 1.59413529  | 0.01395165  |
| C | -4.90114668 | 0.22021121  | 0.01738773  |
| C | -3.63310644 | -0.34057263 | 0.00875615  |
| C | -2.48456265 | 0.50357987  | -0.01127747 |
| C | -2.70194970 | 1.92364196  | -0.01846161 |
| H | -4.08883357 | 3.53967181  | -0.00696608 |
| H | -6.07108890 | 2.01907393  | 0.01315253  |
| H | -5.76992478 | -0.42775077 | 0.02782033  |
| H | -3.50321513 | -1.41631478 | 0.01602673  |
| C | -1.15592674 | 0.16648986  | -0.05187162 |
| C | -0.25073470 | 1.34159338  | -0.09491800 |
| S | -1.15829058 | 2.79657891  | -0.05822011 |
| H | -0.78094087 | -0.84803076 | -0.08128899 |
| H | 0.78029121  | 1.34419267  | 0.22652498  |

**Thianapthene T<sub>1</sub>( $\pi\sigma^*$ ), S-C2 Elongation Geometry**

|   |             |            |            |
|---|-------------|------------|------------|
| C | -4.92079997 | 2.84549503 | 0.55025764 |
| C | -5.93795649 | 1.92363442 | 0.55423981 |

|   |             |             |            |
|---|-------------|-------------|------------|
| C | -5.63240364 | 0.55919462  | 0.56415339 |
| C | -4.31637413 | 0.13536770  | 0.56994941 |
| C | -3.25910594 | 1.04381353  | 0.56614766 |
| C | -3.56359028 | 2.44250406  | 0.55599623 |
| H | -5.13104076 | 3.90793115  | 0.54259400 |
| H | -6.97052050 | 2.25100844  | 0.54973067 |
| H | -6.43206772 | -0.17254665 | 0.56732964 |
| H | -4.09095736 | -0.92546102 | 0.57763686 |
| C | -1.89242893 | 0.56472135  | 0.57243736 |
| C | -0.83468517 | 1.35674220  | 0.56938289 |
| S | -2.35011398 | 3.61737878  | 0.55071213 |
| H | -1.77642221 | -0.52293596 | 0.58010505 |
| H | 0.22500706  | 1.13731233  | 0.57322727 |

**Thianapthene T<sub>1</sub>( $\pi\sigma^*$ ), S-C7a Elongation Geometry**

|   |             |             |            |
|---|-------------|-------------|------------|
| C | -4.89373731 | 2.89388713  | 0.56933645 |
| C | -5.93117863 | 1.95911339  | 0.56320505 |
| C | -5.65282083 | 0.59235700  | 0.56244987 |
| C | -4.34725627 | 0.14733465  | 0.56775971 |
| C | -3.28304804 | 1.07433610  | 0.57400373 |
| C | -3.60615044 | 2.42890505  | 0.57453732 |
| H | -5.11460836 | 3.95623027  | 0.56990164 |
| H | -6.96235721 | 2.29726167  | 0.55899147 |
| H | -6.46742871 | -0.12205215 | 0.55766486 |
| H | -4.12890015 | -0.91630475 | 0.56717841 |
| C | -1.92589058 | 0.64954511  | 0.57958275 |
| C | -0.84554539 | 1.52162718  | 0.58582560 |
| S | -0.97399922 | 3.17729928  | 0.58769787 |
| H | -1.72326620 | -0.41815239 | 0.57892432 |

H 0.14970733 1.08208248 0.58973096

**2-Methylbenzothiophene Ground State Geometry**

C -1.58002849 -1.32734454 -0.00002287

C -2.77969753 -0.64214816 0.00000589

C -2.80522813 0.75607727 0.00003984

C -1.63352029 1.48429184 0.00004713

C -0.40486381 0.81680174 0.00001587

C -0.39974135 -0.59243819 -0.00002074

H -1.56032554 -2.41081195 -0.00006222

H -3.71113830 -1.19604209 -0.00000585

H -3.75852427 1.27164375 0.00005995

H -1.65876165 2.56845381 0.00007806

C 0.92267038 1.34979113 0.00003539

C 1.88835531 0.39994954 0.00004674

S 1.21856182 -1.20231578 -0.00009144

H 1.14409171 2.41014262 0.00009030

C 3.36303148 0.59049369 0.00005031

H 3.82589644 0.13760250 0.88093845

H 3.60044896 1.65502912 0.00064727

H 3.82574193 0.13863190 -0.88145154

**2-Methylbenzothiophene S<sub>1</sub>( $\pi\pi^*$ ) Geometry**

C -1.56944938 -1.33527865 -0.08400725

C -2.82448428 -0.63251945 -0.01715193

C -2.83729353 0.74131758 0.04872450

C -1.65115929 1.49818576 0.06771638

C -0.40205188 0.82529809 0.03989165

C -0.41742757 -0.58859633 -0.04455636

H -1.54509938 -2.41508067 -0.15434456

|   |             |             |             |
|---|-------------|-------------|-------------|
| H | -3.74965766 | -1.19390395 | -0.02325600 |
| H | -3.78721001 | 1.26255756  | 0.08885463  |
| H | -1.68794203 | 2.57998536  | 0.10857140  |
| C | 0.90703468  | 1.34308617  | 0.02656449  |
| C | 1.93425118  | 0.37757244  | -0.09890792 |
| S | 1.22625445  | -1.17853958 | -0.10189126 |
| H | 1.13211584  | 2.40151006  | 0.09229229  |
| C | 3.39414336  | 0.58282628  | -0.00598229 |
| H | 3.75424753  | 0.60126329  | 1.03631057  |
| H | 3.66960239  | 1.54062854  | -0.45561008 |
| H | 3.95109425  | -0.20250430 | -0.52281771 |

**2-Methylbenzothiophene S<sub>1</sub>( $\pi\sigma^*$ ), S-C2 Elongation Geometry**

|   |             |             |            |
|---|-------------|-------------|------------|
| C | -4.88241867 | 2.83079664  | 0.69157747 |
| C | -5.91378267 | 1.93955710  | 0.59735955 |
| C | -5.63892940 | 0.56775456  | 0.46990479 |
| C | -4.33577673 | 0.11111920  | 0.43894410 |
| C | -3.25967678 | 0.98816662  | 0.53231606 |
| C | -3.52667684 | 2.39798991  | 0.66338619 |
| H | -5.06774079 | 3.89301370  | 0.79050031 |
| H | -6.93972985 | 2.28629237  | 0.62052350 |
| H | -6.45767323 | -0.13863398 | 0.39519477 |
| H | -4.13600336 | -0.95027145 | 0.34023021 |
| C | -1.89682825 | 0.51223974  | 0.50029929 |
| C | -0.87854676 | 1.34584354  | 0.58903948 |
| S | -2.28945401 | 3.52449679  | 0.78197958 |
| H | -1.75546490 | -0.57257764 | 0.39896486 |
| C | 0.56882896  | 1.19840108  | 0.58893531 |
| H | 0.99751347  | 1.60448761  | 1.51101141 |

|   |            |            |             |
|---|------------|------------|-------------|
| H | 0.88948766 | 0.14790226 | 0.49339402  |
| H | 1.01395250 | 1.76814343 | -0.23336134 |

**2-Methylbenzothiophene S<sub>1</sub>( $\pi\sigma^*$ ), S-C7a Elongation Geometry**

|   |             |             |             |
|---|-------------|-------------|-------------|
| C | -4.83948504 | 2.86723614  | 0.76702899  |
| C | -5.89821147 | 1.96188847  | 0.60613406  |
| C | -5.65162124 | 0.60570890  | 0.40527676  |
| C | -4.35352542 | 0.14061314  | 0.36288275  |
| C | -3.28229810 | 1.04557372  | 0.52558931  |
| C | -3.55566822 | 2.40127913  | 0.72650664  |
| H | -5.05637864 | 3.92073437  | 0.92206860  |
| H | -6.92317592 | 2.31913966  | 0.63830659  |
| H | -6.48048505 | -0.08109431 | 0.28226952  |
| H | -4.15039658 | -0.91470839 | 0.20534204  |
| C | -1.93132624 | 0.63697000  | 0.49042611  |
| C | -0.86865935 | 1.54388878  | 0.64750822  |
| S | -1.13572640 | 3.17014233  | 0.87754728  |
| H | -1.69435227 | -0.41223067 | 0.33507132  |
| C | 0.53023823  | 1.00958940  | 0.63304410  |
| H | 0.62069575  | 0.15410701  | -0.04064955 |
| H | 1.24259994  | 1.78033504  | 0.34437848  |
| H | 0.79925926  | 0.66768627  | 1.63808235  |

**2-Methylbenzothiophene T<sub>1</sub>( $\pi\pi^*$ ) Geometry**

|   |             |             |             |
|---|-------------|-------------|-------------|
| C | -1.52848555 | -1.31617894 | -0.10178483 |
| C | -2.75535059 | -0.63505162 | 0.09509015  |
| C | -2.78676019 | 0.75072619  | 0.19028674  |
| C | -1.62455732 | 1.49520553  | 0.10085567  |
| C | -0.37931169 | 0.84137965  | -0.10043582 |
| C | -0.38321705 | -0.58942342 | -0.20881734 |

|   |             |             |             |
|---|-------------|-------------|-------------|
| H | -1.51552168 | -2.39666645 | -0.18246805 |
| H | -3.67429162 | -1.20479500 | 0.15759079  |
| H | -3.73489945 | 1.25435851  | 0.33851918  |
| H | -1.65097033 | 2.57553815  | 0.18340075  |
| C | 0.87549506  | 1.38535285  | -0.24638789 |
| C | 1.95978830  | 0.37389882  | -0.43059036 |
| S | 1.24767748  | -1.21070248 | -0.50270135 |
| H | 1.08677991  | 2.44743354  | -0.25401824 |
| C | 3.31786803  | 0.56554753  | 0.12399704  |
| H | 3.30052300  | 0.62033420  | 1.22614122  |
| H | 3.75399265  | 1.50148504  | -0.23675408 |
| H | 3.98820973  | -0.25063387 | -0.15152304 |

**2-Methylbenzothiophene T<sub>1</sub>( $\pi\sigma^*$ ), S-C2 Elongation Geometry**

|   |             |             |            |
|---|-------------|-------------|------------|
| C | -4.93723925 | 2.83786083  | 0.69159947 |
| C | -5.94634231 | 1.91409828  | 0.59446602 |
| C | -5.62832998 | 0.55705483  | 0.46904072 |
| C | -4.31046587 | 0.14711053  | 0.44283983 |
| C | -3.25649276 | 1.05891038  | 0.53925795 |
| C | -3.57439776 | 2.45084072  | 0.66803222 |
| H | -5.15606242 | 3.89408341  | 0.78953722 |
| H | -6.98163333 | 2.23230661  | 0.61467323 |
| H | -6.42114656 | -0.17817118 | 0.39183999 |
| H | -4.07563216 | -0.90727121 | 0.34522242 |
| C | -1.89582402 | 0.57734925  | 0.50662127 |
| C | -0.82205221 | 1.34565194  | 0.58962942 |
| S | -2.38177802 | 3.64130249  | 0.79230105 |
| H | -1.78109648 | -0.50794319 | 0.40489770 |
| C | 0.61964947  | 1.13302113  | 0.58311017 |



|   |            |            |             |
|---|------------|------------|-------------|
| H | 1.07182069 | 1.51215902 | 1.50486975  |
| H | 0.87987685 | 0.06909742 | 0.48503949  |
| H | 1.08822649 | 1.67726021 | -0.24277838 |

### **2-Methylbenzothiophene $T_1(\pi\sigma^*)$ , S-C7a Elongation Geometry**

|   |             |             |             |
|---|-------------|-------------|-------------|
| C | -4.91421346 | 2.86920250  | 0.83649777  |
| C | -5.93990015 | 1.95011240  | 0.60437938  |
| C | -5.64433891 | 0.61376254  | 0.33503987  |
| C | -4.33402796 | 0.18489718  | 0.29498889  |
| C | -3.28192816 | 1.09758860  | 0.52674227  |
| C | -3.62041168 | 2.42293727  | 0.79211956  |
| H | -5.14935230 | 3.90786622  | 1.04562536  |
| H | -6.97462343 | 2.27620283  | 0.63336997  |
| H | -6.44910278 | -0.08955147 | 0.15665057  |
| H | -4.10276407 | -0.85519787 | 0.08544208  |
| C | -1.92365825 | 0.68440393  | 0.49177829  |
| C | -0.83335407 | 1.52945591  | 0.71061311  |
| S | -1.04442290 | 3.15138593  | 1.04301728  |
| H | -1.71966840 | -0.36237162 | 0.27989209  |
| C | 0.55356061  | 0.95971364  | 0.64357089  |
| H | 0.54022788  | -0.10915046 | 0.42119650  |
| H | 1.13633311  | 1.47092327  | -0.12555215 |
| H | 1.07312816  | 1.11467820  | 1.59144183  |

### **3-Methylbenzothiophene Ground State Geometry**

|   |             |             |            |
|---|-------------|-------------|------------|
| C | -1.64232686 | 1.25047777  | 0.00002671 |
| C | -2.68186356 | 0.34157717  | 0.00002770 |
| C | -2.43073642 | -1.03454103 | 0.00002543 |
| C | -1.13807671 | -1.51557141 | 0.00002178 |
| C | -0.06584261 | -0.61738351 | 0.00001996 |

|   |             |             |             |
|---|-------------|-------------|-------------|
| C | -0.33903611 | 0.76397994  | 0.00002319  |
| H | -1.83752577 | 2.31625112  | 0.00003081  |
| H | -3.70452394 | 0.69999913  | 0.00003165  |
| H | -3.26315529 | -1.72836531 | 0.00002693  |
| H | -0.95004273 | -2.58345044 | 0.00002023  |
| C | 1.34466219  | -0.89636720 | 0.00001351  |
| C | 2.07302601  | 0.24597142  | 0.00000791  |
| S | 1.12325032  | 1.68570909  | 0.00002922  |
| C | 1.90994150  | -2.27479449 | 0.00001382  |
| H | 3.15068864  | 0.32643750  | -0.00000178 |
| H | 2.99997349  | -2.25488686 | -0.00005456 |
| H | 1.58122580  | -2.83521041 | -0.88025825 |
| H | 1.58133542  | -2.83516572 | 0.88035588  |

### **3-Methylbenzothiophene S<sub>1</sub>( $\pi\pi^*$ ) Geometry**

|   |             |             |             |
|---|-------------|-------------|-------------|
| C | -1.63062577 | 1.27239399  | 0.00003075  |
| C | -2.70677778 | 0.31837242  | 0.00003372  |
| C | -2.45817169 | -1.02745174 | 0.00004221  |
| C | -1.13617094 | -1.55028237 | 0.00005087  |
| C | -0.06495095 | -0.62835316 | 0.00003472  |
| C | -0.34660716 | 0.74202040  | 0.00002548  |
| H | -1.81693524 | 2.33689281  | 0.00002241  |
| H | -3.72805564 | 0.67943404  | 0.00002678  |
| H | -3.29283321 | -1.71944399 | 0.00004455  |
| H | -0.95816470 | -2.61737053 | 0.00007998  |
| C | 1.34324403  | -0.89335181 | 0.00001156  |
| C | 2.12899037  | 0.27425879  | -0.00000654 |
| S | 1.14596447  | 1.64070278  | -0.00000672 |
| C | 1.91153256  | -2.25394466 | -0.00000024 |

|   |            |             |             |
|---|------------|-------------|-------------|
| H | 3.20419002 | 0.35079004  | -0.00000824 |
| H | 3.00077600 | -2.24775944 | 0.00004631  |
| H | 1.55782451 | -2.81109391 | -0.87522584 |
| H | 1.55774448 | -2.81114689 | 0.87515838  |

### **3-Methylbenzothiophene S<sub>1</sub>( $\pi\sigma^*$ ), S-C2 Elongation Geometry**

|   |             |             |             |
|---|-------------|-------------|-------------|
| C | -4.89522280 | 2.84355860  | 0.55028525  |
| C | -5.93523757 | 1.95450397  | 0.55400161  |
| C | -5.66391540 | 0.58130298  | 0.56395918  |
| C | -4.35734978 | 0.11444748  | 0.57006928  |
| C | -3.27638043 | 0.98415053  | 0.56656534  |
| C | -3.54393730 | 2.39877128  | 0.55633836  |
| H | -5.07114902 | 3.91191194  | 0.54262175  |
| H | -6.95898624 | 2.30785294  | 0.54930171  |
| H | -6.48334107 | -0.12831265 | 0.56695292  |
| H | -4.18011784 | -0.95340749 | 0.57773424  |
| C | -1.89095718 | 0.51385653  | 0.57285432  |
| C | -0.93898044 | 1.43078466  | 0.56870815  |
| S | -2.31054625 | 3.53505828  | 0.55134588  |
| H | 0.13776256  | 1.28194108  | 0.57211329  |
| C | -1.63180196 | -0.97210997 | 0.58357936  |
| H | -2.06597179 | -1.44669353 | 1.46921664  |
| H | -2.06203930 | -1.45876435 | -0.29741428 |
| H | -0.56006833 | -1.16523776 | 0.58728746  |

### **3-Methylbenzothiophene S<sub>1</sub>( $\pi\sigma^*$ ), S-C7a Elongation Geometry**

|   |             |            |            |
|---|-------------|------------|------------|
| C | -4.82064580 | 2.87614931 | 0.56963292 |
| C | -5.89699547 | 1.98216174 | 0.56337985 |
| C | -5.67385398 | 0.60839621 | 0.56238471 |
| C | -4.38404142 | 0.11411005 | 0.56756683 |

|   |             |             |             |
|---|-------------|-------------|-------------|
| C | -3.29419733 | 1.00664189  | 0.57387451  |
| C | -3.54759785 | 2.37603930  | 0.57473780  |
| H | -5.01004612 | 3.94608848  | 0.57033797  |
| H | -6.91508120 | 2.35962358  | 0.55926464  |
| H | -6.51480727 | -0.07466493 | 0.55752539  |
| H | -4.21873475 | -0.95821712 | 0.56674284  |
| C | -1.92737798 | 0.58374420  | 0.57949067  |
| C | -0.91799556 | 1.55841351  | 0.58556246  |
| S | -1.15570149 | 3.19505625  | 0.58692134  |
| H | 0.10947067  | 1.19994480  | 0.58972701  |
| C | -1.55691820 | -0.85513458 | 0.57902702  |
| H | -1.97190007 | -1.36634017 | 1.45385448  |
| H | -1.96393917 | -1.36372062 | -0.30105087 |
| H | -0.47569871 | -0.98975489 | 0.58373341  |

### 3-Methylbenzothiophene T<sub>1</sub>( $\pi\pi^*$ ) Geometry

|   |             |             |             |
|---|-------------|-------------|-------------|
| C | -1.61409601 | 1.24414081  | 0.03385936  |
| C | -2.70302910 | 0.33720807  | -0.08042330 |
| C | -2.46793421 | -1.02542611 | -0.15655572 |
| C | -1.17741602 | -1.53397598 | -0.12577560 |
| C | -0.06971876 | -0.65360330 | -0.00785393 |
| C | -0.35059177 | 0.74820278  | 0.07334561  |
| H | -1.79968196 | 2.30988674  | 0.09710284  |
| H | -3.71556029 | 0.72028259  | -0.09936871 |
| H | -3.30556088 | -1.70795433 | -0.24323022 |
| H | -1.01221794 | -2.60264413 | -0.19234686 |
| C | 1.27978021  | -0.94620769 | 0.07153544  |
| C | 2.11702264  | 0.28144222  | 0.22210529  |
| S | 1.14561327  | 1.69047720  | 0.22942251  |

|   |            |             |             |
|---|------------|-------------|-------------|
| C | 1.91538383 | -2.27625314 | 0.06378058  |
| H | 3.15430396 | 0.34520328  | -0.07752469 |
| H | 2.63347283 | -2.36081721 | -0.76189512 |
| H | 1.18926117 | -3.08330567 | -0.03049829 |
| H | 2.49194236 | -2.43198934 | 0.98468092  |

### **3-Methylbenzothiophene T<sub>1</sub>( $\pi\sigma^*$ ), S-C2 Elongation Geometry**

|   |             |             |             |
|---|-------------|-------------|-------------|
| C | -4.90557694 | 2.84270492  | 0.55028342  |
| C | -5.94012775 | 1.94074391  | 0.55409894  |
| C | -5.65370016 | 0.57404271  | 0.56401971  |
| C | -4.34368299 | 0.12682694  | 0.56998586  |
| C | -3.26546281 | 1.01156115  | 0.56638040  |
| C | -3.55578686 | 2.41619064  | 0.55619081  |
| H | -5.09492372 | 3.90906736  | 0.54262000  |
| H | -6.96694459 | 2.28553308  | 0.54946744  |
| H | -6.46323414 | -0.14696240 | 0.56710789  |
| H | -4.15410468 | -0.93864119 | 0.57764556  |
| C | -1.88976531 | 0.52567934  | 0.57275603  |
| C | -0.88658165 | 1.39557333  | 0.56902040  |
| S | -2.33994308 | 3.58834781  | 0.55093272  |
| H | 0.18237381  | 1.21447877  | 0.57263277  |
| C | -1.65072668 | -0.96308950 | 0.58349836  |
| H | -2.09111852 | -1.43199769 | 1.46873976  |
| H | -2.08712571 | -1.44410843 | -0.29721090 |
| H | -0.58180838 | -1.17233624 | 0.58735130  |

### **3-Methylbenzothiophene T<sub>1</sub>( $\pi\sigma^*$ ), S-C7a Elongation Geometry**

|   |             |            |            |
|---|-------------|------------|------------|
| C | -4.86026051 | 2.88278937 | 0.56945821 |
| C | -5.91735382 | 1.97311101 | 0.56327539 |
| C | -5.66396827 | 0.60265034 | 0.56242050 |

|   |             |             |             |
|---|-------------|-------------|-------------|
| C | -4.36674706 | 0.13010898  | 0.56766409  |
| C | -3.28407983 | 1.03317932  | 0.57395250  |
| C | -3.58038699 | 2.39253241  | 0.57460294  |
| H | -5.05749229 | 3.95005909  | 0.57012436  |
| H | -6.94189175 | 2.33096715  | 0.55910741  |
| H | -6.49111760 | -0.09724262 | 0.55760247  |
| H | -4.18721068 | -0.93931078 | 0.56690889  |
| C | -1.91319301 | 0.60346402  | 0.57958289  |
| C | -0.88070184 | 1.54213674  | 0.58571408  |
| S | -1.06790314 | 3.19008763  | 0.58732303  |
| H | 0.13447384  | 1.14936585  | 0.58977471  |
| C | -1.57476646 | -0.84774109 | 0.57895660  |
| H | -1.99758051 | -1.34887741 | 1.45497885  |
| H | -1.98962719 | -1.34626150 | -0.30234412 |
| H | -0.49625453 | -1.00248150 | 0.58361023  |
